# Supplementary material
Source: PubMed Central journal article supplement (PMC9377010)
Supplement: ml2c00249_si_001.pdf [file ml2c00249_si_001.pdf]

# Quinolines and oxazino-quinoline derivatives as small molecule GLI1 inhibitors identified by virtual screening

Fabrizio Manetti,<sup>1,\*</sup> Luisa Maresca,<sup>2</sup> Enrica Crivaro,<sup>2</sup> Sara Pepe,<sup>2</sup> Elena Cini,<sup>1</sup> Snigdha Singh,<sup>1</sup> Paolo Governa,<sup>1</sup> Samuele Maramai,<sup>1</sup> Giuseppe Giannini,<sup>3</sup> Barbara Stecca,<sup>2,\*</sup> Elena Petricci<sup>1,\*</sup>

<sup>1</sup>Dipartimento di Biotecnologie Chimica e Farmacia, Università di Siena, via A. Moro 2, I-53100 Siena, Italy

<sup>2</sup>Istituto per lo Studio, la Prevenzione e la Rete Oncologica (ISPRO), Viale Pieraccini 6, I-50139 Firenze, Italy

<sup>3</sup>R&D, Alfasigma SpA, I-00071 Pomezia (Roma), Italy

|                                                     |          |
|-----------------------------------------------------|----------|
| Computational details                               | page S2  |
| Chemistry: synthetic procedures and analytical data | page S2  |
| Biology                                             | page S8  |
| <sup>1</sup> H and <sup>13</sup> C NMR spectra      | page S9  |
| References                                          | page S43 |

## COMPUTATIONAL DETAILS

A pharmacophoric-based virtual screening approach and molecular docking simulations were applied following computational protocols already described [1-3]. Small molecules were drawn with Maestro (version 11.9, release 2019-1), their structure was optimized within the LigPrep routine (OPLS3e force field), while ionization and tautomerism at  $\text{pH } 7 \pm 1$  were considered with Epik. A Systematic Pseudo Monte Carlo conformational search was then applied to each compound.

Application of the common feature pharmacophoric hypothesis generation of the software Phase resulted in the five-feature pharmacophoric model for putative GLI1 inhibitors previously reported [3], which was in turn used to perform a virtual screening of the commercially available compounds stored in both the Asinex [4] and AKos [5] databases. In further detail, the Ligand Screening routine of Phase was used to generate a ranked list of putative GLI1 ligands based on the fitness score. Among the best scored entries, structurally different compounds were selected (at maximum, five entries were kept that belonged to the same structural class, based on Tanimoto coefficient comparison), avoiding compounds with undesired features, such as chemically reactive groups, or pan-assay interference compounds. The final list was constituted by 41 entries that were purchased from vendors and submitted to biological evaluation.

The three-dimensional structure of the five-finger GLI/DNA complex (protein data bank pdb code 2gli, 2.6 Å resolution) was prepared with the Protein Preparation Wizard of the Maestro 2019-1 suite, as already described [3]. The SiteMap routine was next applied to the whole structure of the target to find putative binding sites for small molecule ligands. Two regions of the GLI1 structure were identified, located at the zinc-finger 4 and between the zinc-fingers 1 and 3, respectively. Molecular docking simulations were performed on the two putative binding sites, by application of the extra-precision mode of the software Glide. Ligands were considered as flexible structures. At most, ten poses *per* ligand were kept, on which a post-dock minimization was performed with default parameters.

## EXPERIMENTAL

### Chemistry

All the compounds purchased from either Asinex or Akos had a purity higher than 90%, as declared by vendors.

All reagents were used as purchased from commercial suppliers without further purification. Flash column chromatography was performed in glass columns using Merck silica gel 60 Å, 230-400 mesh particle size or using an automatic LC Isolera Biotage system. For analytical thin-layer chromatography, Merck aluminium-backed plates pre-coated with silica gel 60 (UV254) were used and visualized by staining with a solution of *p*-anisaldehyde in EtOH or a  $\text{KMnO}_4$  solution.  $^1\text{H}$  NMR and  $^{13}\text{C}$  NMR spectra were recorded at 25 °C using a 400 or 600 MHz Bruker Advance NMR spectrometer. Deuterated chloroform, or dimethylsulfoxide were used as the solvents. Chemical shift ( $\delta$ ) values are given in parts per million (ppm) and refer to the residual signals of the deuterated solvent ( $\delta$  7.26 for  $^1\text{H}$  and  $\delta$  77.6 for  $^{13}\text{C}$  in  $\text{CDCl}_3$ ,  $\delta$  2.50 for  $^1\text{H}$  and  $\delta$  39.52 for  $^{13}\text{C}$  in  $d_6$ -DMSO). The data are presented as follows: chemical shift, multiplicity (s = singlet, d = doublet, dd = doublet of doublets, dt = doublet of triplets, t = triplet, q = quartet, m = multiplet or multiple resonances, bs = broad singlet), coupling constant (J) in hertz and the integration in ppm. Mass spectrometry analyses were recorded by electrospray ionization on an Agilent 1100 Series instrument (flux: 9 L/min, T: 350 °C, P: 40 psi, frag: 70 eV). MW assisted reactions were performed in a CEM Discover MW oven equipped with a 10 mL tube for reactions under pressure and an external IR sensor to record the reaction temperature during irradiation (CEM Corporation).

No unexpected or unusually high safety hazards were encountered.

## General procedure for synthesis of open chain 8-hydroxyquinoline derivatives 2-5 and 15-23

To a solution of aldehyde (1.38 mmol, 1 eq.) in MeOH (2 mL), the proper amine (1.38 mmol, 1 eq.) and 8-idrossiquinoline derivative (1.38 mmol, 1 eq.) were added. The reaction mixture was stirred at reflux overnight. After evaporation *in vacuo*, the crude was purified by flash chromatography.

## General procedure for synthesis of tricyclic 8-hydroxyquinoline derivatives 26-41

An EtOH (20 mL) solution of the proper amine (2.06 mmol, 1.25 eq.) and paraformaldehyde (191 mg, 6.21 mmol, 3.70 eq.) was refluxed for 6 h. The reaction mixture was cooled down to rt, and the proper 8-hydroxyquinoline (1.66 mmol, 1 eq.) was added. The reaction mixture was stirred at rt overnight. After evaporation *in vacuo*, the crude was purified by flash chromatography.

## General procedure for synthesis of tricyclic 8-hydroxyquinoline derivatives 42-43

The proper 8-hydroxyquinoline derivative **2** or **5** (1.66 mmol, 1 eq.) was dissolved in dry THF (20 mL) and carbonyldiimidazole (1.66 mmol, 1 eq.) and Et<sub>3</sub>N (3.32, 2 eq.) were added. The reaction mixture was stirred under N<sub>2</sub> at reflux, overnight. The solution was cooled down to rt, diluted with CH<sub>2</sub>Cl<sub>2</sub> (30 mL) and washed 3 times with 1N HCl (10 mL x 3). The organic phase was dried over dry Na<sub>2</sub>SO<sub>4</sub>, filtered and evaporated *in vacuo*. The crude obtained was purified by flash chromatography.

### 7-((2,4-Dichlorophenyl)(phenethylamino)methyl)quinolin-8-ol (**2**)

<sup>1</sup>H NMR (400 MHz, CDCl<sub>3</sub>, δ ppm): 8.85 (dd, *J* = 4.2, 1.6 Hz, 1H), 8.05 (dd, *J* = 8.3, 1.7 Hz, 1H), 7.46-7.09 (m, 11H), 5.56 (s, 1H), 3.10-3.00 (m, 2H), 2.98-2.83 (m, 2H). <sup>13</sup>C NMR (100 MHz, CDCl<sub>3</sub>, δ): 152.12, 148.37, 138.89, 138.63, 137.14, 135.34, 130.17, 129.11, 128.28, 128.14, 127.13, 126.93, 126.00, 121.29, 120.09, 117.35, 60.75, 49.18, 35.55. ES-MS: 424 [M+H]<sup>+</sup>. Elemental Analysis for C<sub>24</sub>H<sub>20</sub>Cl<sub>2</sub>N<sub>2</sub>O: calcd. C, 68.09, Cl, 16.75, H, 4.76, N, 6.62, O, 3.78; found C, 68.32, Cl, 16.51, H, 4.91, N, 6.78. Yield = 6%.

### 7-((2,4-Dichlorophenyl)(phenethylamino)methyl)-3-methylquinolin-8-ol (**3**)

<sup>1</sup>H NMR (400 MHz, CDCl<sub>3</sub>, δ ppm): 8.69 (d, *J* = 1.9 Hz, 1H), 7.81 (s, 1H), 7.33-7.06 (m, 12H), 5.52 (s, 1H), 3.09-2.95 (m, 1H), 2.95-2.81 (m, 1H), 2.48 (s, 3H). <sup>13</sup>C NMR (100 MHz, CDCl<sub>3</sub>, δ ppm): 152.25, 150.32, 138.66, 137.28, 134.06, 133.77, 133.55, 130.80, 130.22, 129.09, 128.29, 128.15, 127.90, 127.14, 126.98, 126.00, 119.04, 116.77, 60.91, 49.17, 35.55, 18.29. ES-MS: 438 [M+H]<sup>+</sup>. Elemental Analysis for C<sub>25</sub>H<sub>22</sub>Cl<sub>2</sub>N<sub>2</sub>O: calcd. C, 68.65, Cl, 16.21, H, 5.07, N, 6.41, O, 3.66; found C, 68.81, Cl, 16.04, H, 5.00, N, 6.79. Yield = 68%.

### 5-Chloro-7-[(phenethylamino)methyl]-8-quinolinol (**4**)

<sup>1</sup>H NMR: (400 MHz, DMSO-d<sub>6</sub> + MeOH, δ ppm): 8.87 (dd, *J* = 4.3, 1.5 Hz, 1H), 8.39 (dd, *J* = 8.6, 1.5 Hz, 1H), 7.63 (dd, *J* = 8.6, 4.2 Hz, 2H), 7.52 (s, 1H), 7.24-7.02 (m, 4H), 3.90 (s, 2H), 2.87 (t, *J* = 7.6 Hz, 1H), 2.72 (d, *J* = 7.4 Hz, 1H), 2.66-2.55 (m, 1H), 2.32-2.23 (m, 1H). ES-MS: 313 [M+H]<sup>+</sup>. Column chromatography: CH<sub>2</sub>Cl<sub>2</sub>/MeOH (90:10). Elemental Analysis for C<sub>18</sub>H<sub>17</sub>ClN<sub>2</sub>O: calcd. C, 69.12, Cl, 11.33, H, 5.48, N, 8.96, O, 5.12; found C, 69.35, Cl, 11.41, H, 5.30, N, 9.03. Yield = 30%.

### 7-[(Phenethylamino)methyl]-8-quinolinol (**5**)

<sup>1</sup>H NMR (400 MHz, CDCl<sub>3</sub>, δ ppm) 8.78 (dd, 1H, *J* = 4.3, 1.6 Hz), 8.00 (dd, 1H, *J* = 8.3, 1.7 Hz), 7.38-7.01 (m, 8H), 4.07 (s, 2H), 2.92 (t, 2H, *J* = 6.7 Hz), 2.82 (t, 2H, *J* = 7.0 Hz). <sup>13</sup>C NMR (100 MHz, CDCl<sub>3</sub>, δ ppm) 151.86, 148.10, 139.01, 138.54, 135.34, 128.32, 128.24, 127.62, 125.90, 120.82, 119.45, 116.87, 50.16, 49.59, 35.55. ES-MS: 279 [M+H]<sup>+</sup>. Column chromatography: CH<sub>2</sub>Cl<sub>2</sub>/MeOH (90:10). Elemental Analysis for C<sub>18</sub>H<sub>18</sub>N<sub>2</sub>O: calcd. C, 77.67, H, 6.52, N, 10.06, O, 5.75; found C, 77.88, H, 6.76, N, 10.23. Yield = 31%.

### 7-[(Cyclohexylamino)(2,4-dichlorophenyl)methyl]-8-quinolinol (**15**)

Column chromatography: PE/EtOAc (from 0 to 50% di EtOAc in 10 min, from 50 to 100% di EtOAc in 3 min, 100% EtOAc 3 min).

<sup>1</sup>H NMR:(400 MHz, DMSO-d<sub>6</sub>, δ ppm): 8.86 (d, 1H; *J* = 2 Hz); 8.31-8.25 (m, 2H); 7.58- 7.41 (m, 2H); 7.01-6.77 (m, 3H); 3.32 (s, 1H); 1.93-1.49 (m, 2H); 1.52-1.08 (m, 8H). <sup>13</sup>C NMR:(100

MHz, DMSO-d<sub>6</sub>, δppm) as mixture of rotamers: 147.85; 147.09; 132.72; 131.22; 129.35; 129.17; 127.79; 121.18; 120.58; 117.29; 116.71; 109.60; 108.57; 58.44; 55.06; 32.93; 25.42; 24.57. ES-MS: 401 [M+H]<sup>+</sup>. Elemental Analysis for C<sub>22</sub>H<sub>22</sub>Cl<sub>2</sub>N<sub>2</sub>O: calcd. C, 65.84, Cl, 17.67, H, 5.53, N, 6.98, O, 3.99; found C, 65.70, Cl, 17.83, H, 5.25, N, 7.03. Yield = 12%.

**7-((Cyclopentylamino)(2,4-dichlorophenyl)methyl)quinolin-8-ol (16)**

<sup>1</sup>H NMR (400 MHz, CDCl<sub>3</sub>, δ ppm): 8.85 (d, *J* = 3.8 Hz, 1H), 8.03 (d, *J* = 8.2 Hz, 1H), 7.44-7.29 (m, 3H), 7.18 (d, *J* = 8.4 Hz, 1H), 7.13 (d, *J* = 8.4 Hz, 1H), 7.08 (d, *J* = 8.4 Hz, 1H), 5.64 (s, 1H), 3.26-3.14 (m, 1H), 1.97-1.82 (m, 2H), 1.68 (s, 2H), 1.61-1.42 (m, 4H). <sup>13</sup>C NMR (100 MHz, CDCl<sub>3</sub>, δ ppm): 152.83, 148.49, 139.21, 135.28, 133.67, 130.62, 129.16, 128.01, 127.30, 126.85, 121.18, 120.41, 117.26, 59.99, 58.15, 32.39, 31.95, 23.20. ES-MS: 388 [M+H]<sup>+</sup>. Elemental Analysis for C<sub>21</sub>H<sub>20</sub>Cl<sub>2</sub>N<sub>2</sub>O: calcd. C, 65.12, Cl, 18.31, H, 5.21, N, 7.23, O, 4.13; found C, 65.02, Cl, 18.39, H, 5.55, N, 7.04. Yield = 11%.

**7-[(Butylamino)(2,4-dichlorophenyl)methyl]-8-quinolinol (17)**

Column chromatography: PE/EtOAc (from 0 to 50% EtOAc in 10 min, from 50 to 100% EtOAc in 3 min, 100% EtOAc 3 min).

<sup>1</sup>H NMR:(400 MHz, CDCl<sub>3</sub>, δppm): 8.86 (d, 1H; *J*=3.2 Hz); 8.05 (d, 1H; *J*=8.4 Hz); 7.39-7.35 (m, 2H); 7.31 (d, 1H; *J*=8.4 Hz); 7.18 (d, 1H; *J*= 4.8 Hz); 7.14-7.07 (m, 2H); 5.53 (s, 1H); 2.76 (t, 2H; *J*= 7.2 Hz); 1.62-1.49 (m, 2H); 1.39-1.30 (m, 2H); 0.87 (t, 3H; *J*= 7.4 Hz). <sup>13</sup>C NMR: (100 MHz, CDCl<sub>3</sub>, δ ppm): 152.73; 148.45; 139.10; 137.13; 135.53; 135.32; 133.72; 130.39; 129.14; 128.05; 127.26; 126.97; 119.77; 117.29; 116.68; 61.57; 48.15; 31.36; 18.95; 13.46. Elemental Analysis for C<sub>20</sub>H<sub>20</sub>Cl<sub>2</sub>N<sub>2</sub>O: calcd. C, 64.01, Cl, 18.89, H, 5.37, N, 7.46, O, 4.26; found C, 64.15, Cl, 19.01, H, 5.61, N, 7.22. Yield = 14%.

**7-[(Butylamino)methyl]-8-quinolinol (18)**

Column chromatography: CH<sub>2</sub>Cl<sub>2</sub>/MeOH (97:3). <sup>1</sup>H NMR:(400 MHz, CDCl<sub>3</sub>, δ ppm): 8.85 (d, 1H; *J*= 1.6 Hz); 8.03 (d, 1H; *J*= 1.6 Hz); 7.35-7.21 (m, 2H); 7.09 (d, 1H; *J*= 8.4 Hz); 4.10 (s, 2H); 2.80-2.71 (m, 2H); 1.51-1.23 (m, 4H); 0.89-0.77 (m, 3H). <sup>13</sup>C NMR: (100 MHz, CDCl<sub>3</sub>, δppm): 148.86, 148.08, 135.42, 135.29, 127.60, 125.49, 120.89, 120.58, 118.65, 116.82, 80.61, 47.41, 29.59, 29.41. ES-MS: 231 [M+H]<sup>+</sup>. Elemental Analysis for C<sub>14</sub>H<sub>18</sub>N<sub>2</sub>O: C, 73.01, H, 7.88, N, 12.16, O, 6.95; found C, 73.17, H, 7.61, N, 11.96. Yield = 13%.

**7-[(Cyclopentylamino)methyl]-8-quinolinol (19)**

Column chromatography: CH<sub>2</sub>Cl<sub>2</sub>/MeOH (95:5). <sup>1</sup>H NMR:(400 MHz, CDCl<sub>3</sub>, δ ppm): 8.76 (d, 1H; *J*=3.6 Hz); 8.08 (t, 1H; *J*= 8.6 Hz); 7.73 (d, 1H; *J*= 8.2 Hz); 7.42-7.37 (m, 1H); 7.35-7.23 (m, 1H); 4.20 (s, 2H); 2.79-2.74 (m, 1H); 2.20-2.10 (m, 2H); 1.57-1.37 (m, 4H); 1.23-1.08 (m, 4H). <sup>13</sup>C NMR:(100 MHz, CDCl<sub>3</sub>, δ ppm): 147.95; 135.65; 129.14; 128.19; 121.92; 55.53; 55.33; 41.91; 29.26; 29.13; 28.87; 25.16; 24.49; 24.12. ES-MS: 243 [M+H]<sup>+</sup>. Elemental Analysis for C<sub>15</sub>H<sub>18</sub>N<sub>2</sub>O: calcd. C, 74.35, H, 7.49, N, 11.56, O, 6.60; found C, 74.61, H, 7.53, N, 11.74. Yield = 3%.

**7-((Butylamino)(4-chlorophenyl)methyl)quinolin-8-ol (20)**

<sup>1</sup>H NMR (400 MHz, CDCl<sub>3</sub>, δ ppm): 8.79 (d, *J* = 3.1 Hz, 1H), 8.00 (d, *J* = 7.7 Hz, 1H), 7.39 (d, *J* = 8.2 Hz, 2H), 7.31 (dd, *J* = 8.2, 4.2 Hz, 1H), 7.23 (dd, *J* = 7.8, 6.8 Hz, 2H), 7.18 (d, *J* = 8.4 Hz, 2H), 5.18 (s, 1H), 2.69 (t, *J* = 7.0 Hz, 2H), 1.54 (dt, *J* = 13.7, 6.1 Hz, 2H), 1.44-1.25 (m, 2H), 0.86 (t, *J* = 7.3 Hz, 3H). <sup>13</sup>C NMR (100 MHz, CDCl<sub>3</sub>, δ ppm): 151.30, 148.24, 147.61, 140.86, 135.60, 135.29, 132.90, 130.14, 128.48, 128.36, 127.84, 126.57, 122.03, 121.07, 117.30, 116.66, 64.25, 47.82, 31.54, 19.97, 13.49. ES-MS: 341 [M+H]<sup>+</sup>. Elemental Analysis for C<sub>20</sub>H<sub>21</sub>ClN<sub>2</sub>O: calcd. C, 70.48, Cl, 10.40, H, 6.21, N, 8.22, O, 4.69; found C, 70.76, Cl, 10.66, H, 6.42, N, 8.09. Yield = 12%.

**7-((Butylamino)(3,4-dichlorophenyl)methyl)quinolin-8-ol (21)**

<sup>1</sup>H NMR (400 MHz, CDCl<sub>3</sub>, δ ppm): 8.81 (d, *J* = 4.3 Hz, 1H), 8.07 (d, *J* = 9.1 Hz, 1H), 7.74-7.59 (m, 1H), 7.52-7.16 (m, 7H), 5.36 (dd, *J* = 30.6, 20.9 Hz, 1H), 2.79-2.65 (m, 2H), 1.59 (dd, *J* = 8.3, 5.3 Hz, 2H), 1.33 (dt, *J* = 14.4, 7.2 Hz, 2H), 1.06-0.73 (m, 3H). <sup>13</sup>C NMR (100 MHz, CDCl<sub>3</sub>, δ ppm): 150.40, 148.10, 142.58, 138.46, 135.45, 132.19, 130.91, 130.19, 128.93, 127.58, 126.41, 126.22, 121.93, 121.27, 117.59, 62.24, 47.64, 31.37, 19.96, 13.48, 0.58. ES-

MS: 376 [M+H]<sup>+</sup>. Elemental Analysis for C<sub>20</sub>H<sub>20</sub>Cl<sub>2</sub>N<sub>2</sub>O: calcd. C, 64.01, Cl, 18.89, H, 5.37, N, 7.46, O, 4.26; found C, 64.17, Cl, 19.01, H, 5.65, N, 7.72. Yield = 14%.

**7-((Butylamino)(3,5-dichlorophenyl)methyl)quinolin-8-ol (22)**

<sup>1</sup>H NMR (400 MHz, CDCl<sub>3</sub>, δ ppm): 8.75 (s, 1H), 8.01 (d, *J* = 8.0 Hz, 1H), 7.43 (s, 2H), 7.38 (d, *J* = 8.5 Hz, 1H), 7.32 (dd, *J* = 7.8, 3.5 Hz, 1H), 7.22 (d, *J* = 8.4 Hz, 1H), 7.16 (s, 1H), 5.29 (s, 1H), 2.91-2.53 (m, 2H), 1.51 (dd, *J* = 14.2, 7.1 Hz, 2H), 1.33 (dd, *J* = 14.4, 7.2 Hz, 2H), 0.86 (t, *J* = 7.2 Hz, 3H). <sup>13</sup>C NMR (100 MHz, CDCl<sub>3</sub>, δ ppm): 150.07, 148.00, 146.56, 138.36, 135.48, 134.61, 127.51, 126.94, 126.14, 125.47, 122.67, 121.23, 117.60, 61.75, 47.66, 31.74, 20.00, 13.54. ES-MS: 376 [M+H]<sup>+</sup>. Elemental Analysis for C<sub>20</sub>H<sub>20</sub>Cl<sub>2</sub>N<sub>2</sub>O: calcd. C, 64.01, Cl, 18.89, H, 5.37, N, 7.46, O, 4.26; found C, 64.15, Cl, 18.63, H, 5.59, N, 7.67. Yield = 17%.

**7-((Butylamino)(3-chlorophenyl)methyl)quinolin-8-ol (23)**

<sup>1</sup>H NMR (400 MHz, CDCl<sub>3</sub>, δ ppm): 8.69 (d, *J* = 4.0 Hz, 1H), 7.87 (d, *J* = 8.2 Hz, 1H), 7.49 (s, 1H), 7.38-7.30 (m, 2H), 7.27 (d, *J* = 8.5 Hz, 1H), 7.18 (dd, *J* = 8.2, 4.2 Hz, 2H), 7.13-7.06 (m, 3H), 5.20 (s, 1H), 2.61 (t, *J* = 7.1 Hz, 2H), 1.53-1.41 (m, 2H), 1.33-1.21 (m, 2H), 0.80 (t, *J* = 7.3 Hz, 3H). <sup>13</sup>C NMR (100 MHz, CDCl<sub>3</sub>, δ ppm): 150.81, 148.02, 147.42, 144.82, 138.64, 135.34, 134.00, 129.52, 127.55, 127.08, 126.47, 125.20, 122.67, 121.00, 117.36, 63.32, 47.72, 31.63, 19.99, 13.54. ES-MS: 341 [M+H]<sup>+</sup>. Elemental Analysis for C<sub>20</sub>H<sub>21</sub>ClN<sub>2</sub>O: calcd. C, 70.48, Cl, 10.40, H, 6.21, N, 8.22, O, 4.69; found C, 70.63, Cl, 10.75, H, 6.05, N, 8.46. Yield = 36%.

**4-Butoxy-7-[(cyclohexylamino)methyl]-8-quinolinol (24)**

Column chromatography: CH<sub>2</sub>Cl<sub>2</sub>/MeOH (95:5). <sup>1</sup>H NMR: (400 MHz, CDCl<sub>3</sub>, δ ppm): 8.69 (d, 1H; *J* = 5.2 Hz); 7.66 (d, 1H; *J* = 8.8 Hz); 7.06 (d, 1H; *J* = 8.4 Hz); 6.68 (d, 1H; *J* = 5.2 Hz); 5.23 (s, 2H); 4.16 (t, 3H; *J* = 6 Hz); 1.80-1.97 (m, 2H); 1.91-1.86 (m, 4H); 1.61-1.54 (m, 6H); 1.34-1.17 (m, 6H). ES-MS: 351 [M+Na]<sup>+</sup>. Elemental Analysis for C<sub>20</sub>H<sub>28</sub>N<sub>2</sub>O<sub>2</sub>: calcd. C, 73.14, H, 8.59, N, 8.53, O, 9.74; found C, 73.42, H, 8.78, N, 8.81. Yield = 8%.

**4-(Benzyloxy)-7-[(cyclohexylamino)methyl]-8-quinolinol (25)**

Column chromatography: CH<sub>2</sub>Cl<sub>2</sub>/MeOH (99:1). <sup>1</sup>H NMR (400 MHz, CDCl<sub>3</sub>, δ ppm): 8.68 (d, *J* = 5.1 Hz, 1H), 7.70 (d, *J* = 8.6 Hz, 1H), 7.50-7.29 (m, 5H), 7.06 (d, *J* = 8.6 Hz, 1H), 6.75 (d, *J* = 5.2 Hz, 1H), 5.23 (s, 2H), 4.15 (s, 2H), 2.81-2.37 (m, 1H), 2.09-1.85 (m, 2H); 1.72-1.68 (m, 2H), 1.31-1.15 (m, 6H). <sup>13</sup>C NMR (100 MHz, CDCl<sub>3</sub>, δ ppm): 161.15; 148.40; 135.26; 128.11; 127.73; 127.30; 127.04; 126.77; 121.12; 101.40; 100.57; 55.29; 29.24; 28.48; 23.81. ES-MS: 362 [M+H]<sup>+</sup>. Elemental Analysis for C<sub>23</sub>H<sub>26</sub>N<sub>2</sub>O<sub>2</sub>: calcd. C, 76.21, H, 7.23, N, 7.73, O, 8.83; found C, 76.45, H, 7.38, N, 7.92. Yield = 53%.

**2-Phenethyl-2,3-dihydro-1H-4-oxa-2,5-diazaphenanthrene (26)**

<sup>1</sup>H NMR: (400 MHz, CDCl<sub>3</sub>, δ ppm): 8.86 (dd, *J* = 4.2, 1.8 Hz, 1H), 8.03 (dd, *J* = 8.3, 1.8 Hz, 1H), 7.42-7.02 (m, 8H), 5.16 (s, 2H), 4.15 (s, 2H), 3.09 (dd, *J* = 8.9, 6.4 Hz, 2H), 2.90 (dd, *J* = 9.1, 6.2 Hz, 2H). <sup>13</sup>C NMR (100 MHz, CDCl<sub>3</sub>, δ ppm): 149.00, 139.29, 135.46, 128.26, 127.93, 127.66, 125.71, 125.60, 120.76, 118.50, 117.68, 82.68, 76.98, 76.67, 76.35, 52.97, 50.39, 34.48. Elemental Analysis for C<sub>19</sub>H<sub>18</sub>N<sub>2</sub>O: calcd. C, 78.59, H, 6.25, N, 9.65, O, 5.51; found C, 78.81, H, 6.48, N, 9.87. Yield = 22%.

**7-Fluoro-2-phenethyl-2,3-dihydro-1H-4-oxa-2,5-diazaphenanthrene (27)**

Column chromatography: EtOAc. <sup>1</sup>H NMR: (400 MHz, CDCl<sub>3</sub>, δ ppm): 8.67 (d, *J* = 2.8 Hz, 1H), 7.54 (dd, *J* = 9.0, 2.8 Hz, 1H), 7.21-6.98 (m, 7H), 5.08 (s, 2H); 4.05 (s, 2H); 2.99 (q, 2H; *J* = 7.6 Hz); 2.80 (q, 2H; *J* = 7.6 Hz). <sup>13</sup>C NMR (100 MHz, CDCl<sub>3</sub>, δ ppm): 157.87, 155.33, 149.90, 140.02, 139.60, 136.36, 136.33, 136.32, 128.74, 128.65, 128.60, 128.54, 128.48, 128.41, 128.32, 127.53, 118.64, 118.47, 118.30, 117.37, 117.35, 83.25, 53.36, 50.51, 34.85. ES-MS: 309 [M+H]<sup>+</sup>. Elemental Analysis for C<sub>19</sub>H<sub>17</sub>FN<sub>2</sub>O: calcd. C, 74.01, F, 6.16, H, 5.56, N, 9.09, O, 5.19; found C, 74.32, F, 6.23, H, 5.78, N, 9.31. Yield = 55%.

**1-(2,4-Dichlorophenyl)-2-phenethyl-2,3-dihydro-1H-4-oxa-2,5-diazaphenanthrene (28)**

<sup>1</sup>H NMR: (400 MHz, CDCl<sub>3</sub>, δ ppm): 8.93 (dd, *J* = 4.3, 1.7 Hz, 1H), 8.08 (dd, *J* = 8.2, 1.7 Hz, 1H), 7.54-7.34 (m, 3H), 7.31-7.00 (m, 6H), 6.95 (d, *J* = 8.4 Hz, 1H), 6.75 (d, *J* = 8.3 Hz, 1H), 5.23 (s, 2H), 5.09 (dd, *J* = 10.7, 1.7 Hz, 1H), 4.89 (d, *J* = 10.7 Hz, 1H), 3.46-3.89 (m,

3H), <sup>13</sup>C NMR (100 MHz, CDCl<sub>3</sub>, δ ppm): δ 150.05, 149.26, 139.09, 138.49, 135.58, 135.23, 133.80, 131.80, 129.54, 128.32, 128.22, 127.91, 126.79, 126.05, 125.70, 121.39, 118.65, 117.10, 59.70, 54.28, 34.38. ES-MS: 436 [M+H]<sup>+</sup>. Elemental Analysis for C<sub>25</sub>H<sub>20</sub>Cl<sub>2</sub>N<sub>2</sub>O: calcd. C, 68.97, Cl, 16.29, H, 4.63, N, 6.43, O, 3.68; found C, 69.07, Cl, 16.39, H, 4.86, N, 6.77. Yield = 21%.

**2-[2-(3-Indolyl)ethyl]-2,3-dihydro-1H-4-oxa-2,5-diazaphenanthrene (29)**

Column chromatography: CH<sub>2</sub>Cl<sub>2</sub>/MeOH (90:10). <sup>1</sup>H NMR:(400 MHz, DMSO-d<sub>6</sub>, δ ppm): 10.59 (bs, 1H); 8.79 (d, 1H; *J* = 3.6 Hz); 8.26 (d, 1H; *J* = 8.4 Hz); 7.49 (m, 2H); 7.33 (q, 2H; *J* = 26.4 Hz); 7.19 (d, 1H; *J* = 8.4 Hz); 6.91 (m, 2H); 3.95 (s, 2H); 3.63 (s, 2H); 2.85 (t, 2H; *J* = 10.8 Hz); 2.68 (d, 2H; *J* = 4.8 Hz). ES-MS: 330 [M+H]<sup>+</sup>. Elemental Analysis for C<sub>21</sub>H<sub>19</sub>N<sub>3</sub>O: calcd. C, 76.57, H, 5.81, N, 12.76, O, 4.8613; found C, 76.79, H, 5.94, N, 12.85. Yield = 10%.

**9-Chloro-2-[2-(3-indolyl)ethyl]-2,3-dihydro-1H-4-oxa-2,5-diazaphenanthrene (30)**

Column chromatography: CH<sub>2</sub>Cl<sub>2</sub>/MeOH (90:10). <sup>1</sup>H NMR: (400 MHz, DMSO-d<sub>6</sub>, δ ppm): 10.60 (bs, 1H); 8.90 (s, 1H); 8.44 (d, 1H; *J* = 8.4 Hz); 7.67 (d, 1H; *J* = 8.8 Hz); 7.55 (d, 1H; *J* = 8.4 Hz); 7.31 (d, 1H; *J* = 7.6 Hz); 7.20 (d, 1H; *J* = 7.6 Hz); 7.03 (d, 1H; *J* = 8.4 Hz); 6.97-6.87(m, 2H); 3.95 (s, 2H); 3.66 (s, 2H); 3.86 (s, 2H); 2.69 (s, 2H). ES-MS: 364 [M+H]<sup>+</sup>. Elemental Analysis for C<sub>21</sub>H<sub>18</sub>ClN<sub>3</sub>O: calcd. C, 69.32, Cl, 9.74, H, 4.99, N, 11.55, O, 4.40; found C, 69.54, Cl, 9.92; H, 5.08; N, 11.76. Yield = 16%.

**2-[(*p*-Methoxyphenyl)methyl]-2,3-dihydro-1H-4-oxa-2,5-diazaphenanthrene (32)**

Column chromatography: PE/EtOAc: (50:50). <sup>1</sup>H NMR: (400 MHz, CDCl<sub>3</sub>, δ ppm): 8.86 (d, 1H; *J* = 4.4 Hz); 8.03 (d, 1H; *J* = 8.0 Hz); 7.32 (q, 1H; *J* = 12.4 Hz); 7.25 (q, 3H; *J* = 8.4 Hz); 7.04 (d, 1H; *J* = 8.4 Hz); 6.82 (d, 2H; *J* = 8.4 Hz); 5.12 (s, 2H); 4.05 (s, 2H); 3.89 (s, 2H); 3.75 (s, 3H). <sup>13</sup>C NMR (100 MHz, CDCl<sub>3</sub>, δ ppm): 158.98, 149.50, 149.37, 139.32, 135.91, 130.19, 130.08, 128.10, 126.17, 121.15, 119.00, 117.86, 113.81, 83.07, 55.22, 55.17, 49.42. ES-MS: 307 [M+H]<sup>+</sup>. Elemental Analysis for C<sub>19</sub>H<sub>18</sub>N<sub>2</sub>O<sub>2</sub>: calcd. C, 74.49, H, 5.92, N, 9.14, O, 10.44; found C, 74.64, H, 6.02, N, 9.36. Yield = 48%.

**2-(1,2,3,4-Tetrahydro-2-naphthyl)-2,3-dihydro-1H-4-oxa-2,5-diazaphenanthrene (33)**

Column chromatography: EtOAc. <sup>1</sup>H NMR: (400 MHz, CDCl<sub>3</sub>, δ ppm): 8.84 (d, 1H; *J* = 3.2 Hz); 7.98 (d, 1H; *J* = 8.4 Hz); 7.55 (t, 1H; *J* = 8.8 Hz); 7.28 (q, 1H; *J* = 12.4 Hz); 7.20 (d, 1H; *J* = 8.4 Hz); 7.11 (q, 2H; *J* = 8.8 Hz); 7.02 (d, 1H; *J* = 4.4 Hz); 6.99 (d, 1H; *J* = 8.8) 5.25 (t, 2H; *J* = 14.4 Hz); 4.24 (d, 1H; *J* = 8 Hz); 4.15 (d, 1H; *J* = 17.6 Hz) 3.85 (d, 1H; *J* = 17.6 Hz); 2.64 (m, 2H); 2.04 (q, 1H; *J* = 14.8 Hz); 1.78 (t, 1H; *J* = 12.4 Hz); 1.60 (q, 2H; *J* = 12.4 Hz). ES-MS: 317 [M+H]<sup>+</sup>. Elemental Analysis for C<sub>21</sub>H<sub>20</sub>N<sub>2</sub>O: calcd. C, 79.72, H, 6.37, N, 8.85, O, 5.06; found C, 79.88, H, 6.25, N, 8.64. Yield = 51%.

**2-Cyclohexyl-2,3-dihydro-1H-4-oxa-2,5-diazaphenanthrene (34)**

Column chromatography: CH<sub>2</sub>Cl<sub>2</sub>/MeOH (90:10). <sup>1</sup>H NMR: (400 MHz, CDCl<sub>3</sub>, δ ppm): 8.84 (t, 1H; *J* = 4.4 Hz); 8.02 (d, 1H; *J* = 8.4 Hz); 7.36-7.19 (m, 1H); 7.10 (d, 1H; *J* = 8.4 Hz); 5.23 (s, 2H); 4.19 (s, 2H); 2.75 (q, 1H; *J* = 21.6 Hz); 1.99 (t, 2H, *J* = 21.8 Hz); 1.68 (d, 2H; *J* = 12.4 Hz); 1.52 (d, 1H, *J* = 11.6 Hz); 1.32-1.18 (m, 6H). ES-MS: 269 [M+H]<sup>+</sup>. Elemental Analysis for C<sub>17</sub>H<sub>20</sub>N<sub>2</sub>O: calcd. C, 76.09, H, 7.51, N, 10.44, O, 5.96; found C, 76.31, H, 7.80, N, 10.73. Yield = 35%.

**2-Cyclohexyl-7-fluoro-2,3-dihydro-1H-4-oxa-2,5-diazaphenanthrene (35)**

Column chromatography: CH<sub>2</sub>Cl<sub>2</sub>/MeOH (9:1). <sup>1</sup>H NMR: (400 MHz, CDCl<sub>3</sub>, δ ppm): 8.67 (d, 1H; *J* = 2.8 Hz); 7.59 (q, 1H; *J* = 11.6 Hz); 7.22 (d, 1H; *J* = 8 Hz) 7.11 (d, 1H *J* = 8.4 Hz); 5.2 (s, 2H); 4.18 (s, 2H); 2.78- 2.71 (m, 1H); 1.94 (d, 2H; *J* = 12.3 Hz) 1.69 (d, 2H; *J* = 12.3 Hz) 1.54 (d, 1H; *J* = 12.3 Hz) 1.30-1.06 (m, 5H). <sup>13</sup>C NMR (100 MHz, CDCl<sub>3</sub>, δ ppm): 157.89, 155.35, 150.91, 140.13, 139.86, 136.59, 128.40, 128.35, 127.12, 119.07, 119.04, 118.55, 118.38, 117.93, 117.88, 81.46, 59.48, 47.25, 31.63, 25.77, 25.47. ES-MS: 287 [M+H]<sup>+</sup>. Elemental Analysis for C<sub>17</sub>H<sub>19</sub>FN<sub>2</sub>O: calcd. C, 71.31, F, 6.63, H, 6.69, N, 9.78, O, 5.59; found C, 71.55, F, 6.78, H, 6.54, N, 9.91. Yield = 48%.

**2-(4-Methylcyclohexyl)-2,3-dihydro-1H-4-oxa-2,5-diazaphenanthrene (36)**

Column chromatography: CH<sub>2</sub>Cl<sub>2</sub>/toluene/MeOH (90:5:5). <sup>1</sup>H NMR: (400 MHz, CDCl<sub>3</sub>, δ ppm): 8.81 (d, 1H; *J* = 17.6 Hz); 8.01 (d, 1H; *J* = 7.6 Hz); 7.31-7.00 (m, 3H); 5.23 (s, 2H); 4.18 (s, 2H); 2.86-2.81 (m, 1H); 1.77-1.58 (m, 4H); 1.40-1.20 (m, 4H); 0.88 (d, 3H; *J* = 6.4 Hz). <sup>13</sup>C NMR: (100 MHz, CDCl<sub>3</sub>, δ ppm): 147.98; 135.34; 128.19; 127.71; 120.91; 120.66; 119.10; 117.04; 82.78; 77.05; 51.01; 28.60; 27.98; 20.09; 19.86; 13.46. ES-MS: 283 [M+H]<sup>+</sup>. Elemental Analysis for C<sub>18</sub>H<sub>22</sub>N<sub>2</sub>O: C, 76.56, H, 7.85, N, 9.92, O, 5.67; found C, 76.65, H, 7.89, N, 9.99. Yield = 18%.

#### **2-(Cyclohexylmethyl)-2,3-dihydro-1*H*-4-oxa-2,5-diazaphenanthrene (37)**

Column chromatography: PE/EtOAc (50:50). <sup>1</sup>H NMR: (400 MHz, CDCl<sub>3</sub>, δ ppm): 8.75 (t, 1H; *J* = 4.4 Hz); 7.90 (t, 1H; *J* = 8.4 Hz); 7.23-7.15 (m, 1H); 6.99 (d, 1H; *J* = 8 Hz); 5.00 (s, 2H); 3.98 (s, 2H); 2.52 (d, 2H; *J* = 7.2 Hz); 1.48 (m, 9H); 1.14 (q, 2H; *J* = 37.2 Hz). <sup>13</sup>C NMR: (100 MHz, CDCl<sub>3</sub>, δ ppm): 149.70, 149.34, 139.33, 135.88, 128.01, 126.17, 121.10, 118.67, 118.22, 84.05, 58.49, 51.05, 36.34, 31.38, 26.72, 26.01. ES-MS: 283 [M+H]<sup>+</sup>. Elemental Analysis for C<sub>18</sub>H<sub>22</sub>N<sub>2</sub>O: calcd. C, 76.56, H, 7.85, N, 9.92, O, 5.67; found C, 76.79, H, 7.91, N 9.76. Yield = 48%.

#### **2-Cycloheptyl-2,3-dihydro-1*H*-4-oxa-2,5-diazaphenanthrene (38)**

Column chromatography: PE/EtOAc (50:50). <sup>1</sup>H NMR: (400 MHz, CDCl<sub>3</sub>, δ ppm): 8.77 (d, 1H; *J* = 3.6 Hz); 7.92 (d, 1H; *J* = 8.4 Hz); 7.22-7.11 (m, 3H); 5.11 (s, 2H); 4.08 (s, 2H); 2.89 (d, 1H; *J* = 8.8 Hz); 1.38 (m, 12H). <sup>13</sup>C NMR: (100 MHz, CDCl<sub>3</sub>, δ ppm): 149.35, 135.85, 127.89, 125.58, 121.05, 118.63, 81.74, 62.56, 47.73, 32.97, 27.86, 24.65. ES-MS: 283 [M+H]<sup>+</sup>, 305 [M+Na]<sup>+</sup>. Elemental Analysis for C<sub>18</sub>H<sub>22</sub>N<sub>2</sub>O: calcd. C, 76.56, H, 7.85, N, 9.92, O, 5.67; found C, 76.60, H, 7.88, N, 9.89. Yield = 87%.

#### **2-Cyclooctyl-2,3-dihydro-1*H*-4-oxa-2,5-diazaphenanthrene (39)**

Column chromatography: CH<sub>2</sub>Cl<sub>2</sub>/MeOH (95:5). <sup>1</sup>H NMR: (400 MHz, CDCl<sub>3</sub>, δ ppm): 8.76 (brs, 1H); 7.80 (d, 1H; *J* = 8.4 Hz); 7.30-7.23 (m, 2H); 7.15 (d, 1H; *J* = 8 Hz); 5.24 (s, 2H); 4.15 (s, 2H); 2.79 (brs, 1H); 1.65-1.40 (m, 14H). <sup>13</sup>C NMR: (100 MHz, CDCl<sub>3</sub>, δ ppm): 147.87; 138.77; 134.97; 128.14; 127.94; 127.67; 120.81; 117.05; 116.37; 76.42; 57.76; 47.08; 30.58; 26.60; 23.45. Elemental Analysis for C<sub>19</sub>H<sub>24</sub>N<sub>2</sub>O: calcd. C, 76.99; H, 8.16; N, 9.45; O, 5.40; found C, 76.66; H, 8.28; N, 9.63. Yield = 15%.

#### **2-Phenethyl-1,2-dihydro-3*H*-4-oxa-2,5-diazaphenanthren-3-one (42)**

<sup>1</sup>H NMR: (400 MHz, CDCl<sub>3</sub>, δ ppm): 8.97 (dt, *J* = 4.2, 1.9 Hz, 1H), 8.12 – 8.05 (m, 1H), 7.53-7.38 (m, 2H), 7.24 (t, *J* = 2.9 Hz, 4H), 7.18 (tt, *J* = 6.2, 2.6 Hz, 1H), 7.07 (dd, *J* = 8.4, 2.1 Hz, 1H), 4.42 (d, *J* = 2.1 Hz, 2H), 3.76-3.68 (m, 2H), 3.07 – 2.98 (m, 2H). <sup>13</sup>C NMR: (100 MHz, CDCl<sub>3</sub>, δ ppm): 150.46, 135.25, 128.42, 128.25, 126.19, 122.88, 122.55, 121.58, 50.95, 48.39, 32.76. ES-MS: 305 [M+H]<sup>+</sup>. Elemental Analysis for C<sub>19</sub>H<sub>16</sub>N<sub>2</sub>O<sub>2</sub>: calcd. C, 74.98, H, 5.30, N, 9.20, O, 10.51; found C, 75.15, H, 5.51, N, 9.55. Yield = 12%.

#### **1-(2,4-Dichlorophenyl)-2-phenethyl-1,2-dihydro-3*H*-4-oxa-2,5-diazaphenanthren-3-one (43)**

<sup>1</sup>H NMR: (400 MHz, CDCl<sub>3</sub>, δ ppm): 9.02 (dd, *J* = 4.3, 1.6 Hz, 1H), 8.08 (dd, *J* = 8.4, 1.7 Hz, 1H), 7.50 – 7.37 (m, 3H), 7.26 – 7.13 (m, 7H), 7.01 (d, *J* = 8.5 Hz, 1H), 5.95 (s, 1H), 3.99 (dq, *J* = 12.1, 6.4 Hz, 1H), 3.04 (dt, *J* = 13.0, 6.5 Hz, 2H), 2.82 (tq, *J* = 13.0, 5.7 Hz, 1H). <sup>13</sup>C NMR: (100 MHz, CDCl<sub>3</sub>, δ ppm): 150.68, 135.30, 130.19, 129.33, 128.45, 128.34, 128.21, 126.20, 123.43, 122.71, 122.01, 58.27, 49.18, 33.07. ES-MS: 450 [M+H]<sup>+</sup>. Elemental Analysis for C<sub>25</sub>H<sub>18</sub>Cl<sub>2</sub>N<sub>2</sub>O<sub>2</sub>: calcd. C, 66.83, Cl, 15.78, H, 4.04, N, 6.23, O, 7.12; found C, 66.99, Cl, 15.91, H, 4.26, N, 6.48. Yield = 15%.

## **Biology**

### **Cell lines and treatments**

Human melanoma cells A375 (CRL-1619), medulloblastoma cells Daoy (HTB-186), and murine NIH3T3 cells (CRL-1658) were obtained from ATCC (Manassas, VA). Cells were maintained in Dulbecco's modified Eagle's medium (DMEM) (Euroclone, Milan, Italy) (A375 and NIH3T3) or Eagle's Minimum Essential Medium (EMEM) (Euroclone) (Daoy) supplemented with 10% fetal bovine serum (FBS), 1% penicillin-streptomycin, 1% glutamine (Lonza, Basel, Switzerland). Cells were periodically screened for mycoplasma contamination by PCR. A375 and Daoy cells were plated in 24-well or 96-well plates, treated with increasing concentrations of each compound for 72 h in complete medium supplemented with 1% FBS and viable cells counted by trypan blue-exclusion or crystal violet staining. All experimental points were set up in triplicate wells and all experiments were repeated at least three times. IC<sub>50</sub> were calculated using GraphPad Prism version 6.0 (GraphPad software).

### **Western blot analysis**

Cells were lysed in ice-cold RIPA buffer supplemented with protease and phosphatase inhibitors, centrifuged at 4 °C, and supernatant was collected, as previously described [6,7]. Equal amounts of protein were resolved by SDS polyacrylamide gel electrophoresis, transferred into nitrocellulose membranes, and incubated in blocking buffer. The following antibodies were used: mouse anti-GLI1 (#2643) (Cell Signaling Technology, Danvers, MA), goat anti-GLI2 (AF-3635, R&D Systems, Minneapolis, MN), mouse anti-HSP90 (sc-13119) (Santa Cruz Biotechnology, Santa Cruz, CA), and the anti-mouse HRP-conjugated (Cell Signaling). Blotted membranes were developed using SuperSignal West Femto (ThermoFisher Scientific, Italy) and imaged with ChemiDoc™ Imaging Systems (Bio-Rad, Italy).

### **Statistical analysis**

Data represent mean ± SD or mean ± SEM values calculated on at least 3 independent experiments. p Values were calculated using Student's t-test or one-way ANOVA. A two-tailed value of p<0.05 was considered statistically significant.



# <sup>1</sup>H and <sup>13</sup>C NMR of synthesized compounds.

Compound 2.

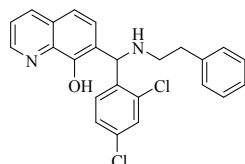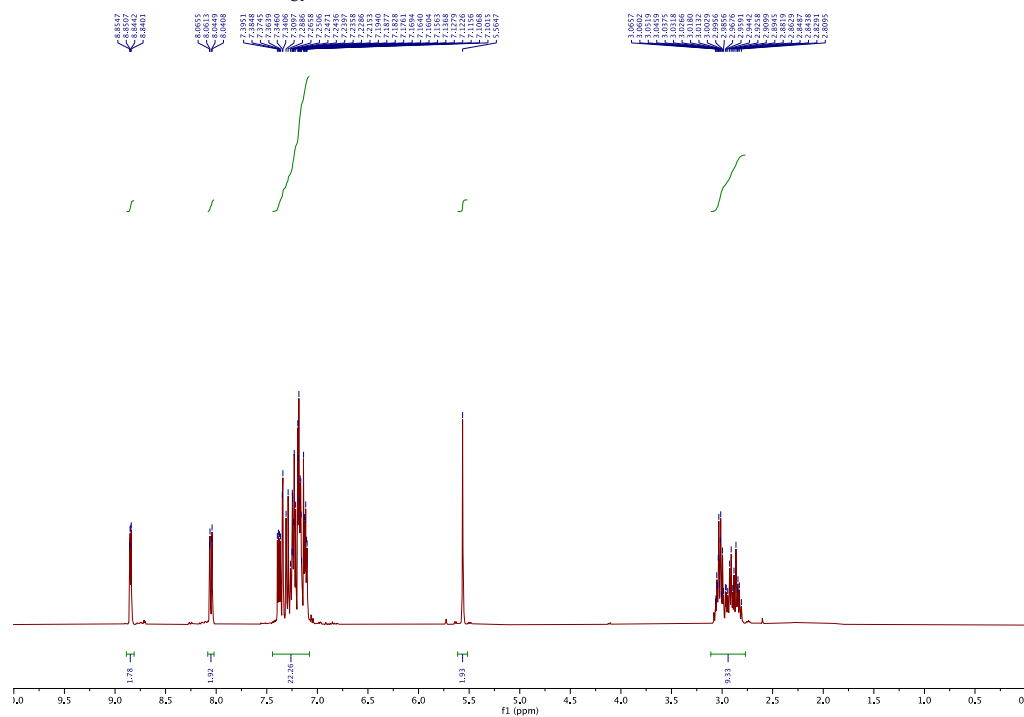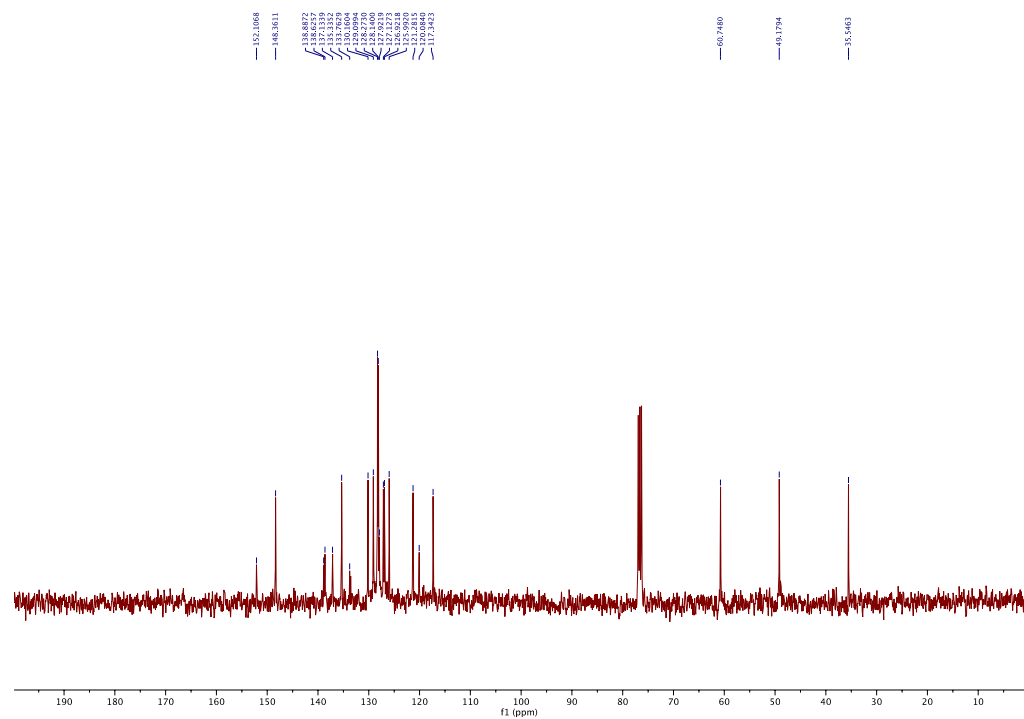

Compound 4.

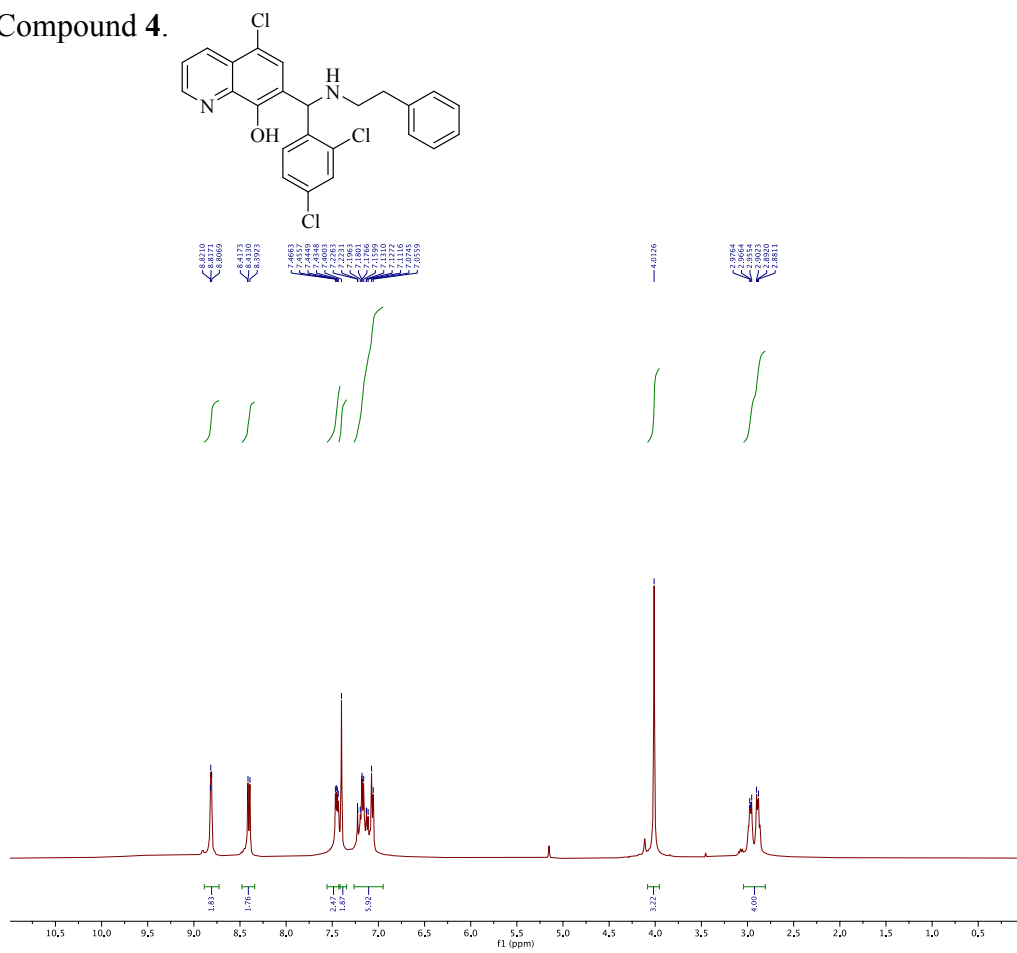

Compound 5.

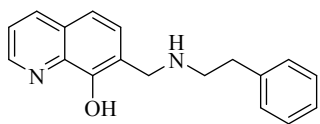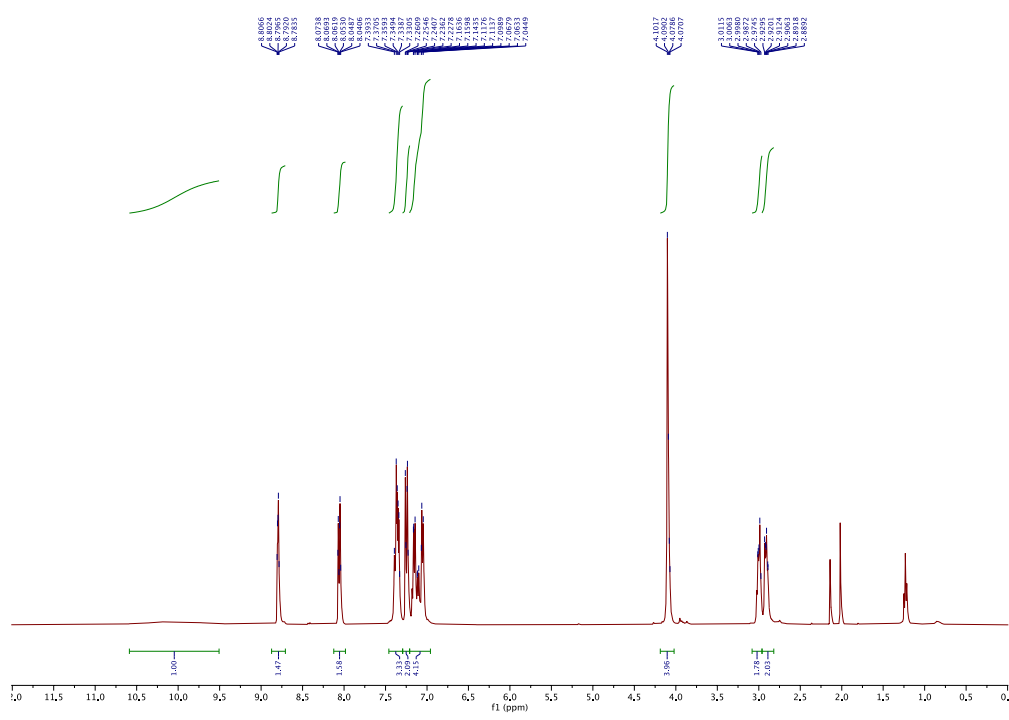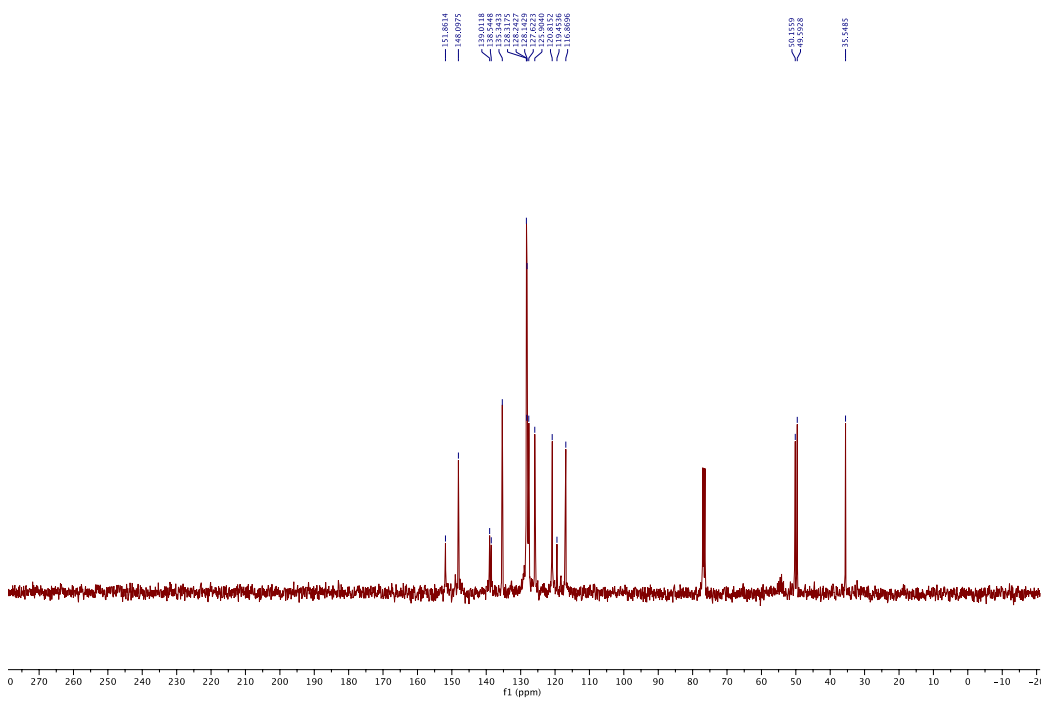

Compound 15.

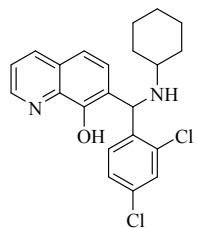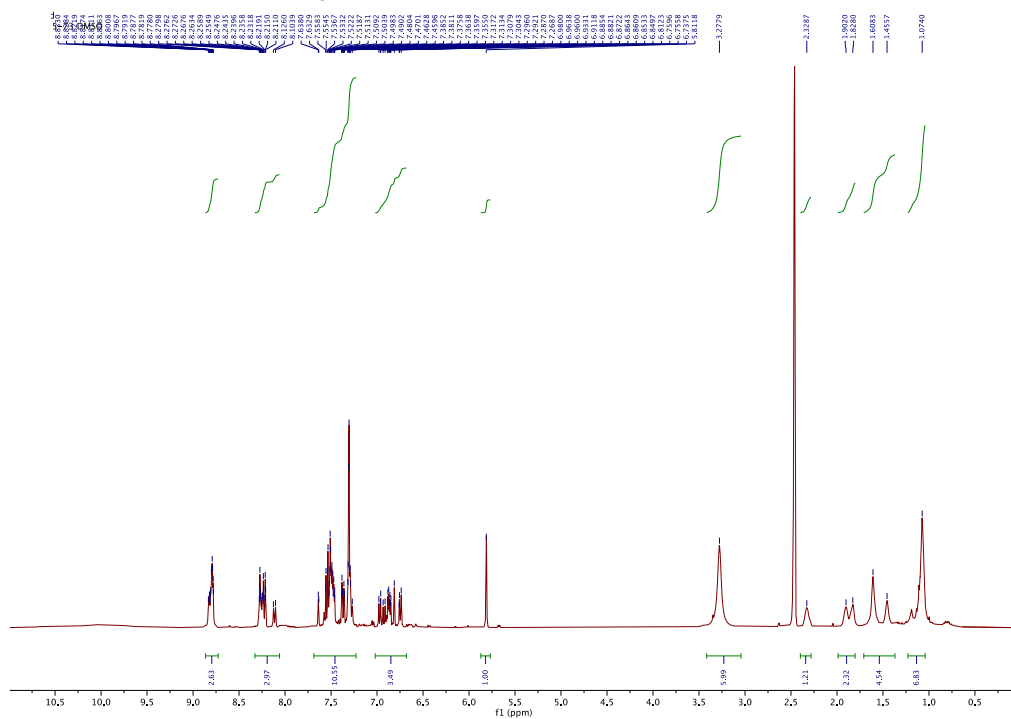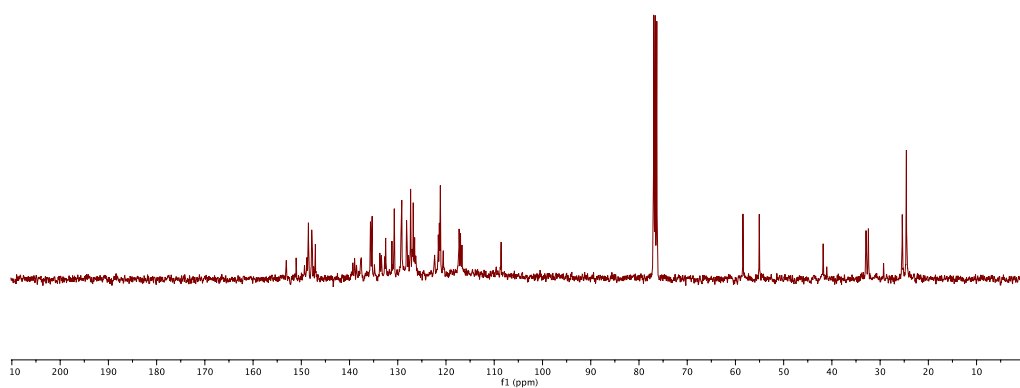

Compound 19.

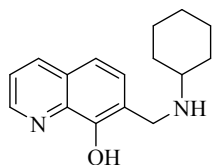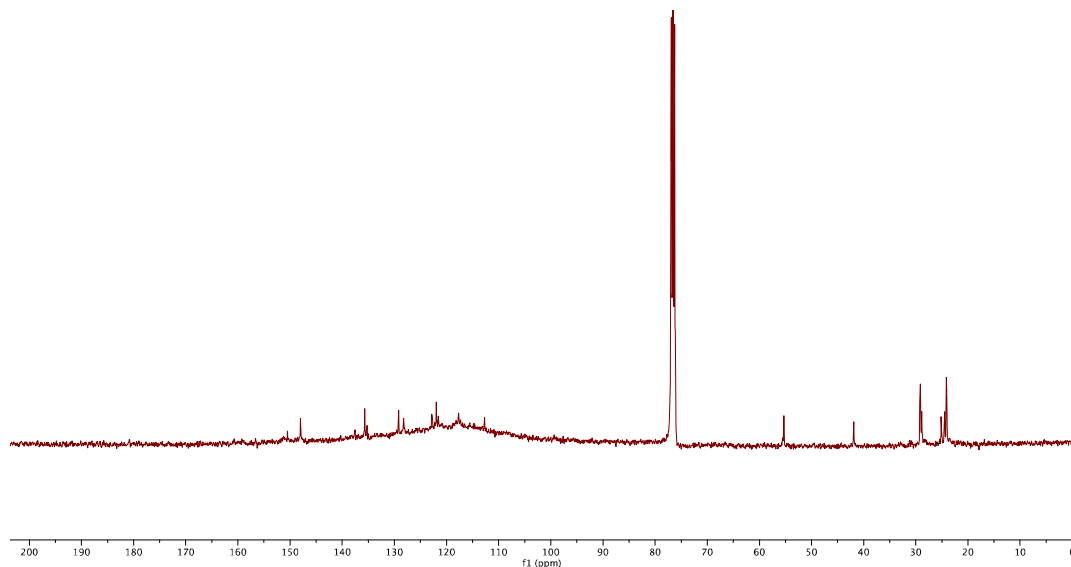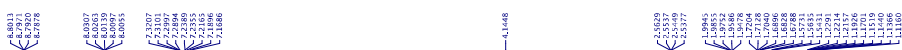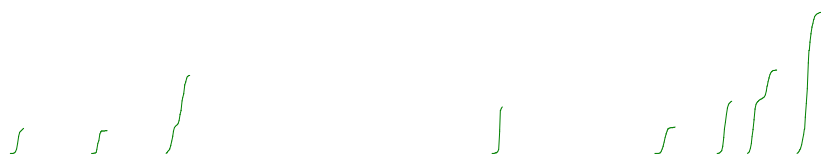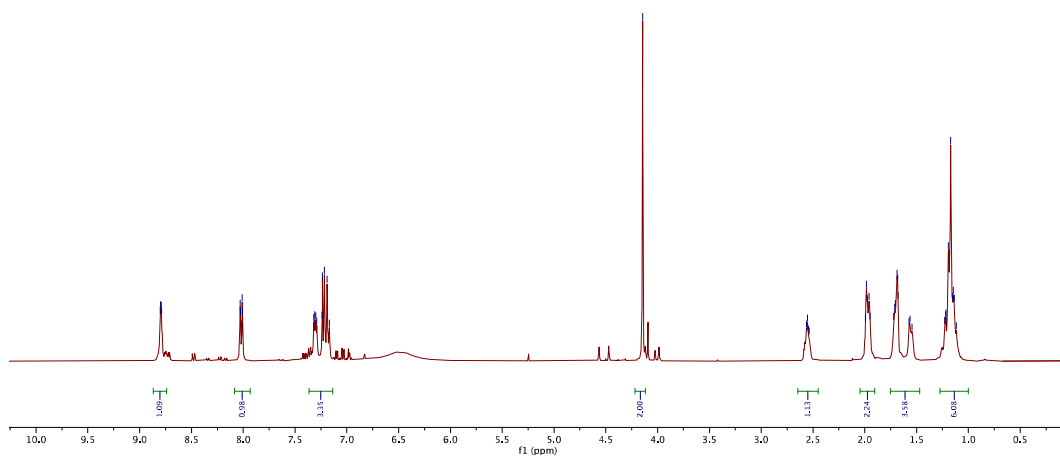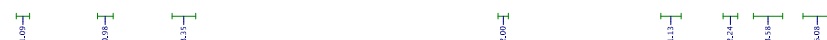

Compound 16.

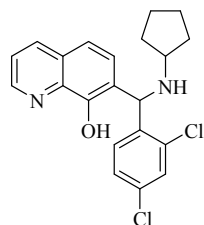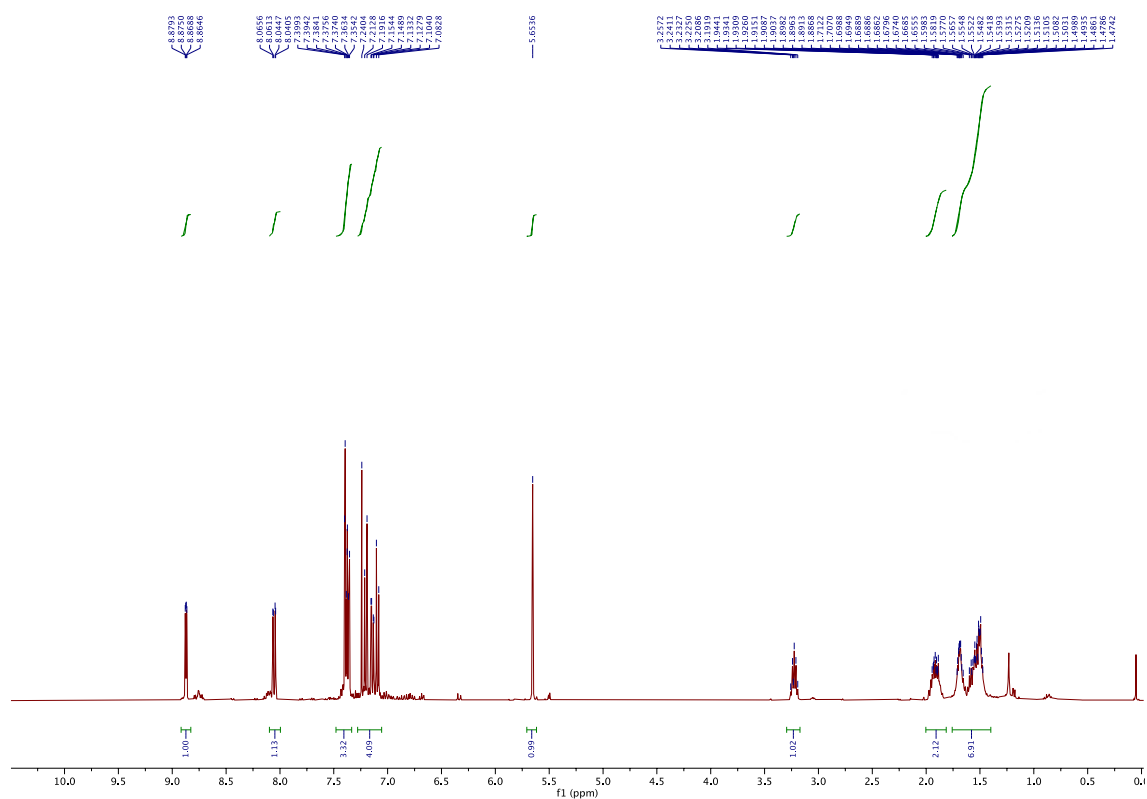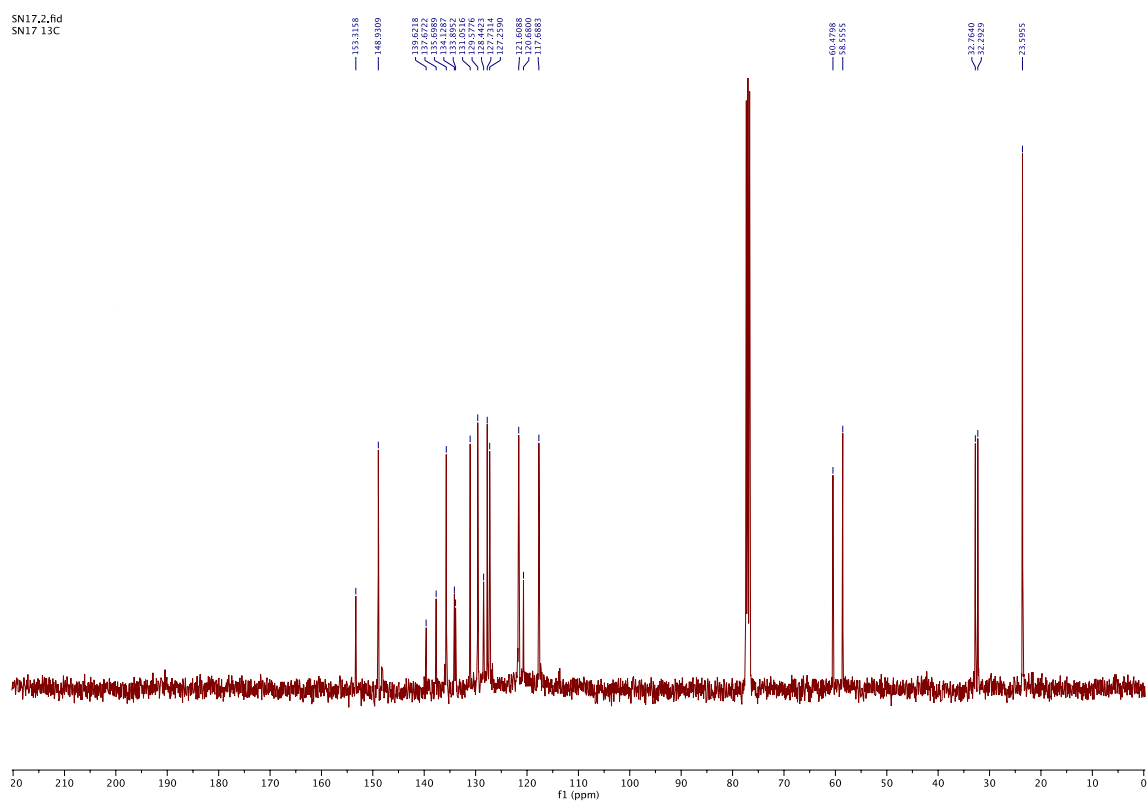

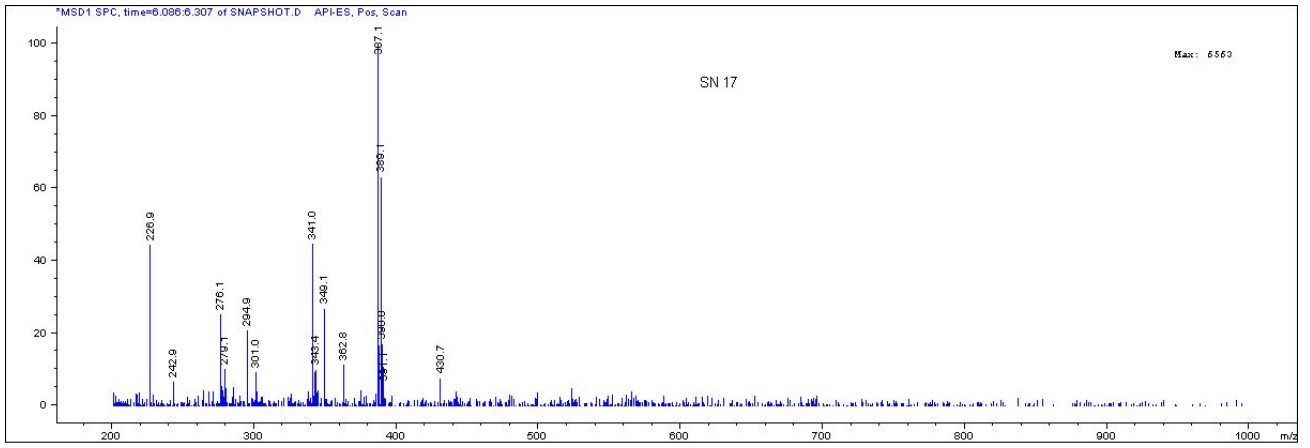

Compound 17.

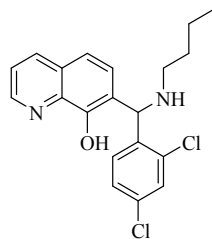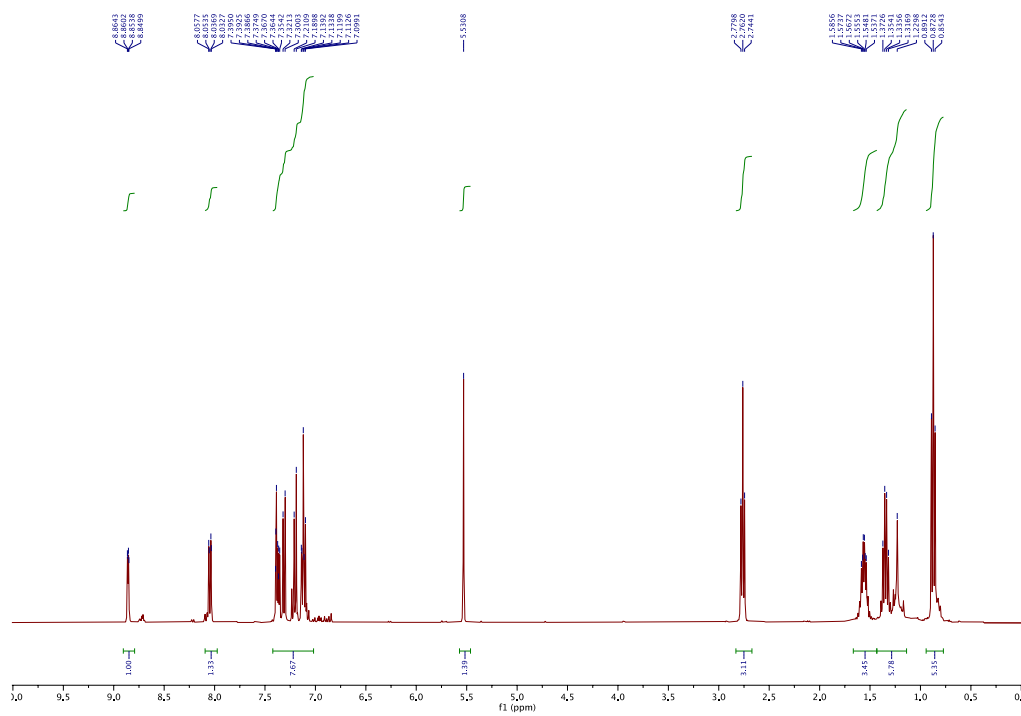

RT17.5.fid  
RT17 faz 19-23 13C

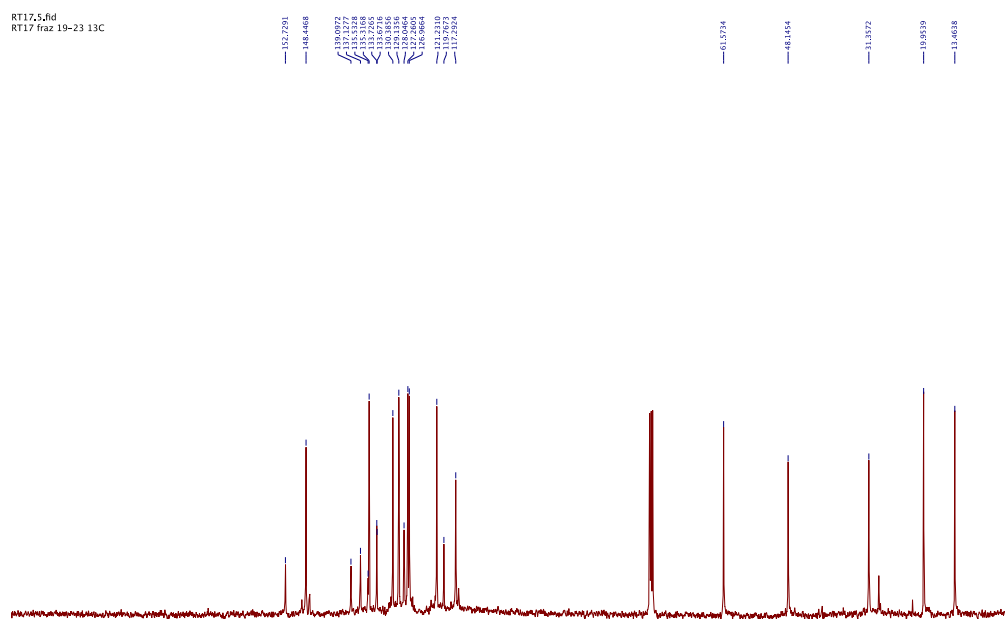



Compound 18.

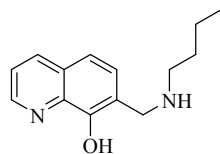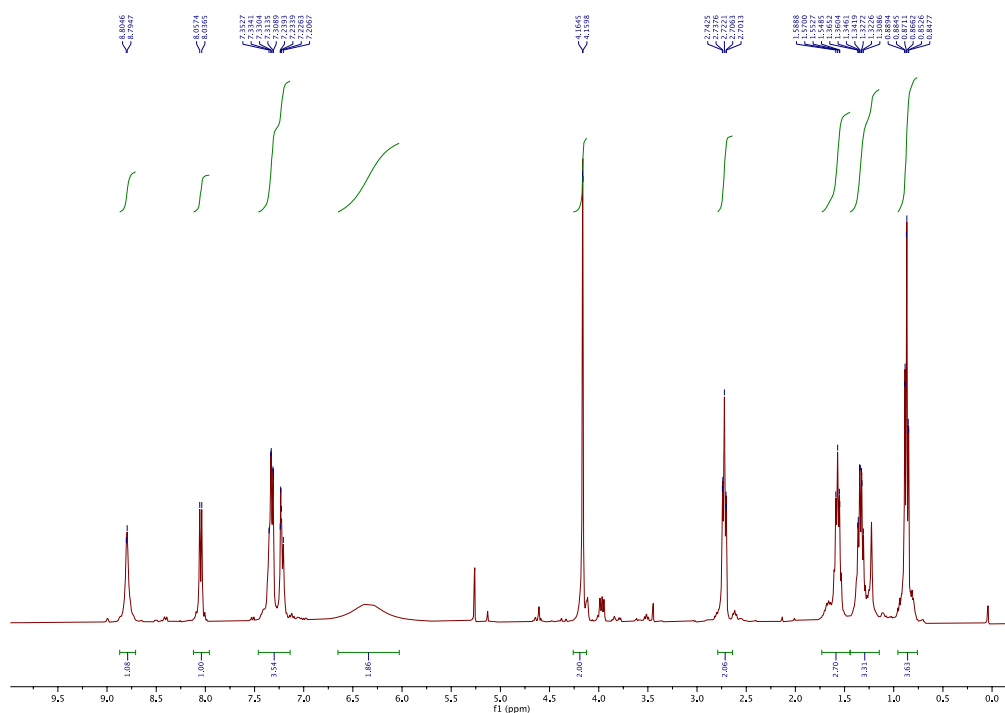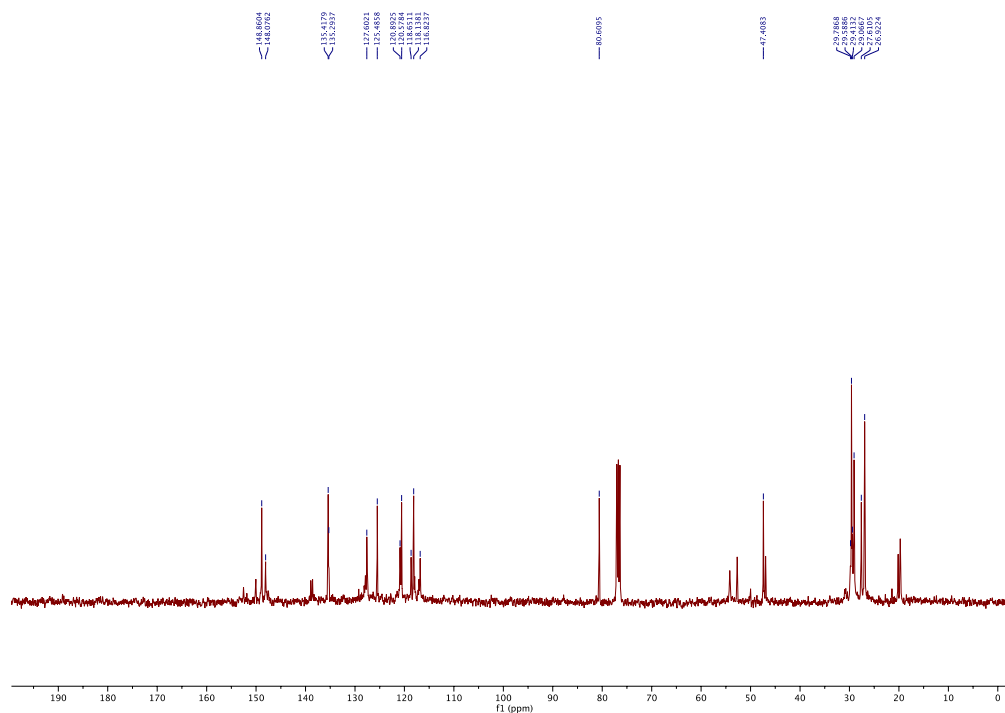

Compound 20.

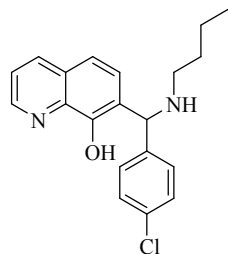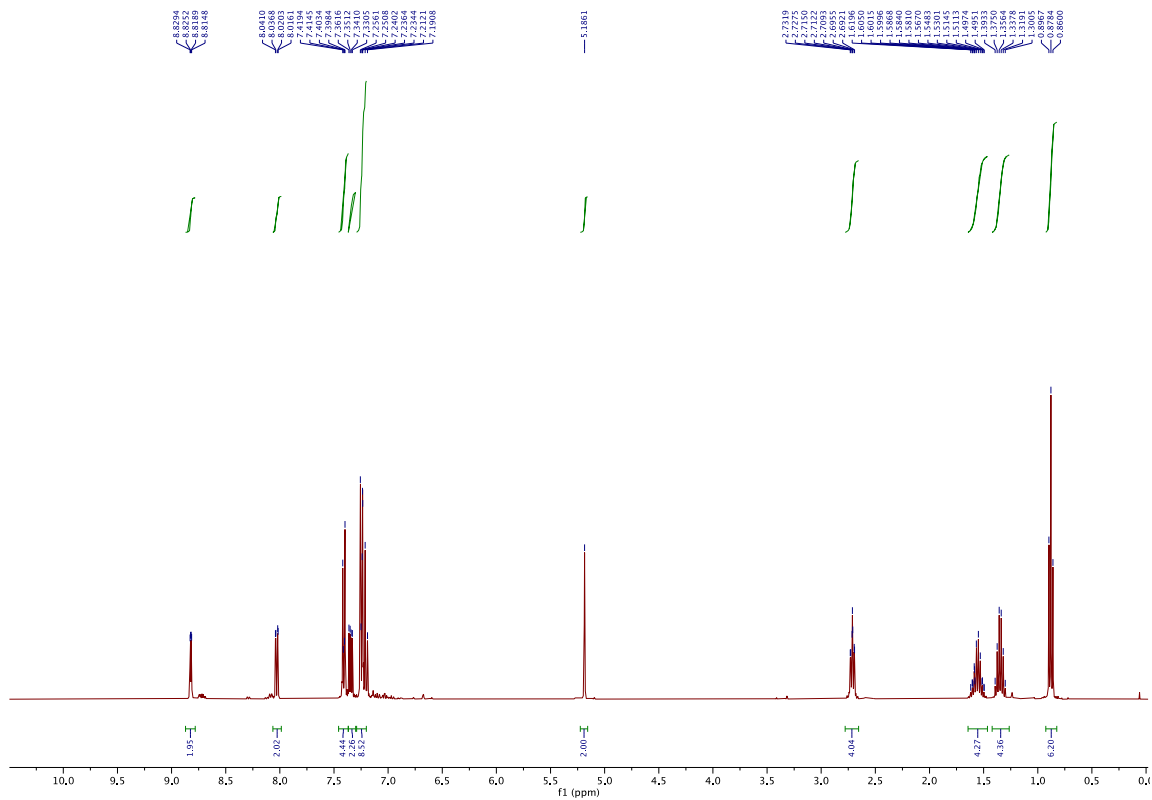

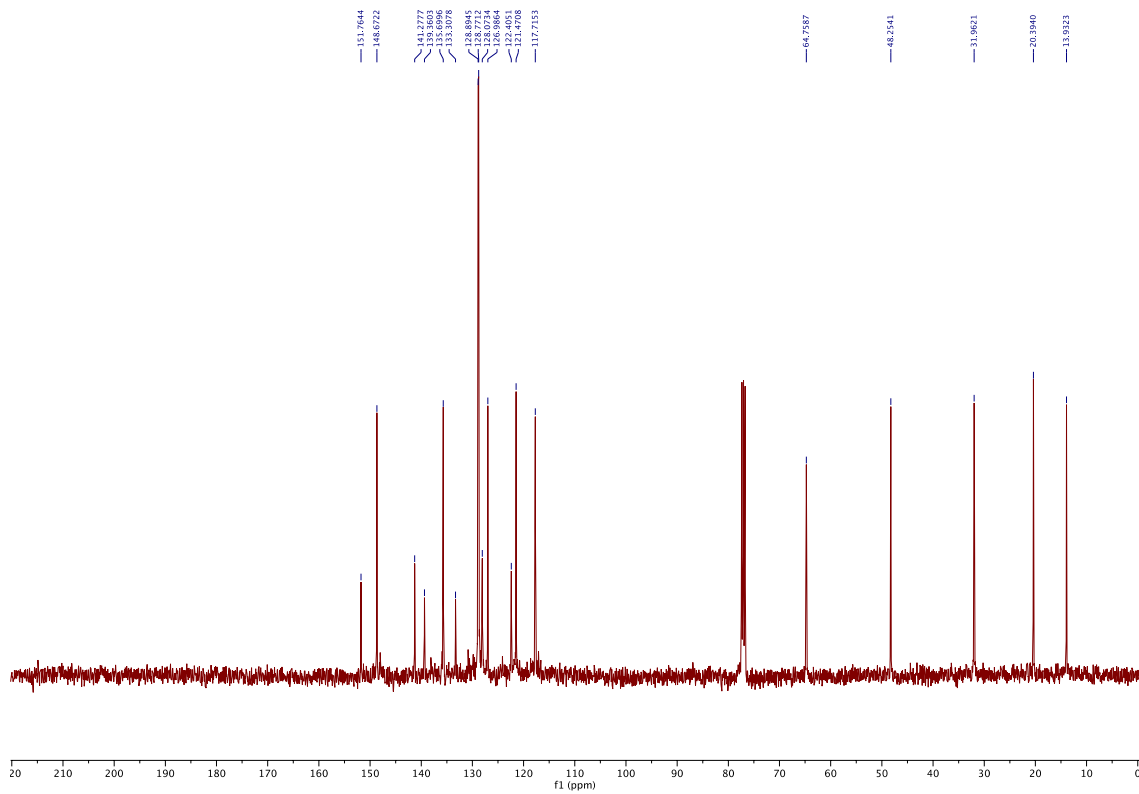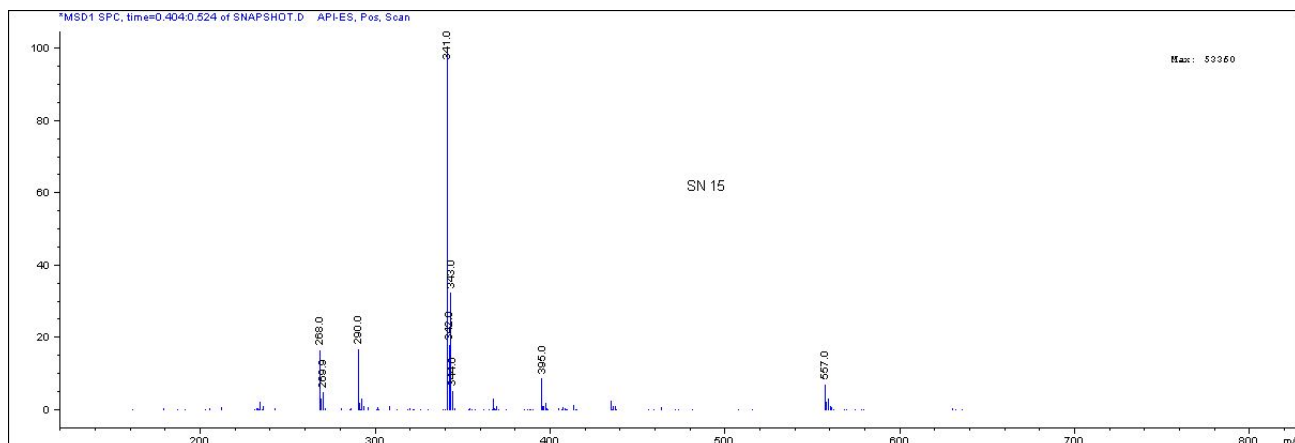

Compound 21.

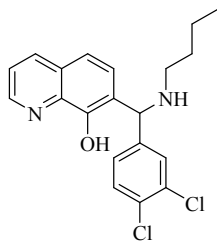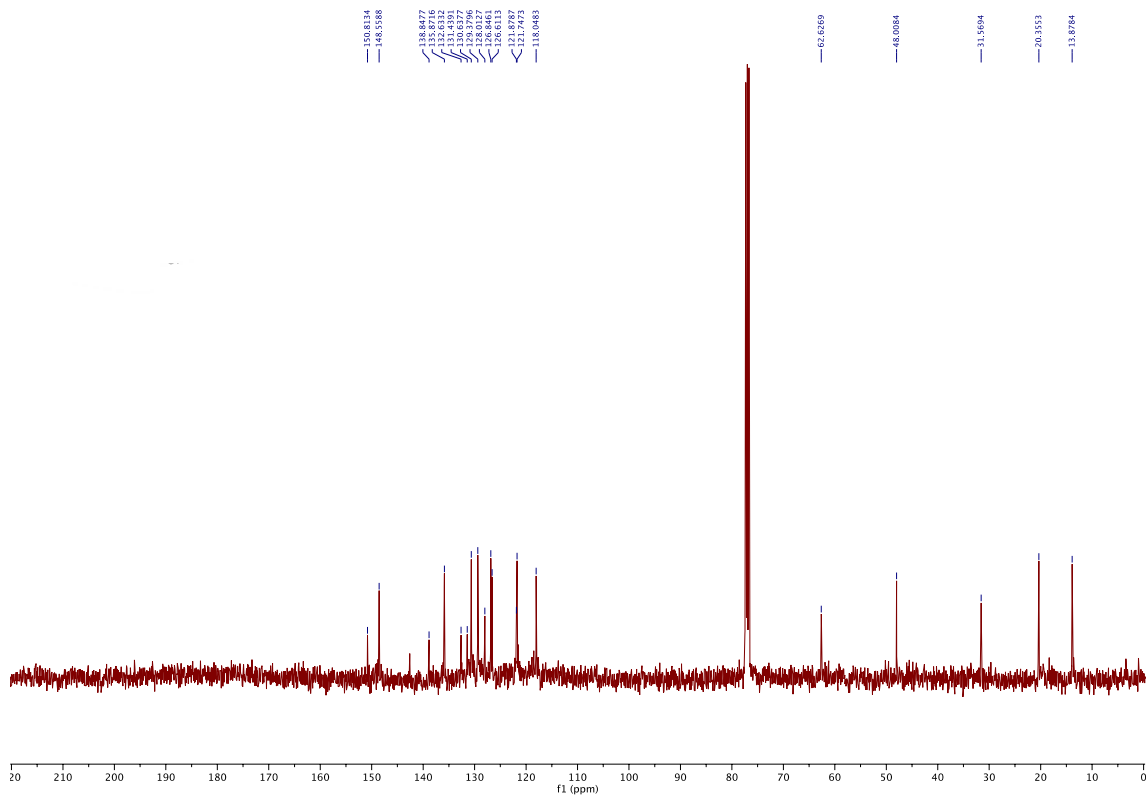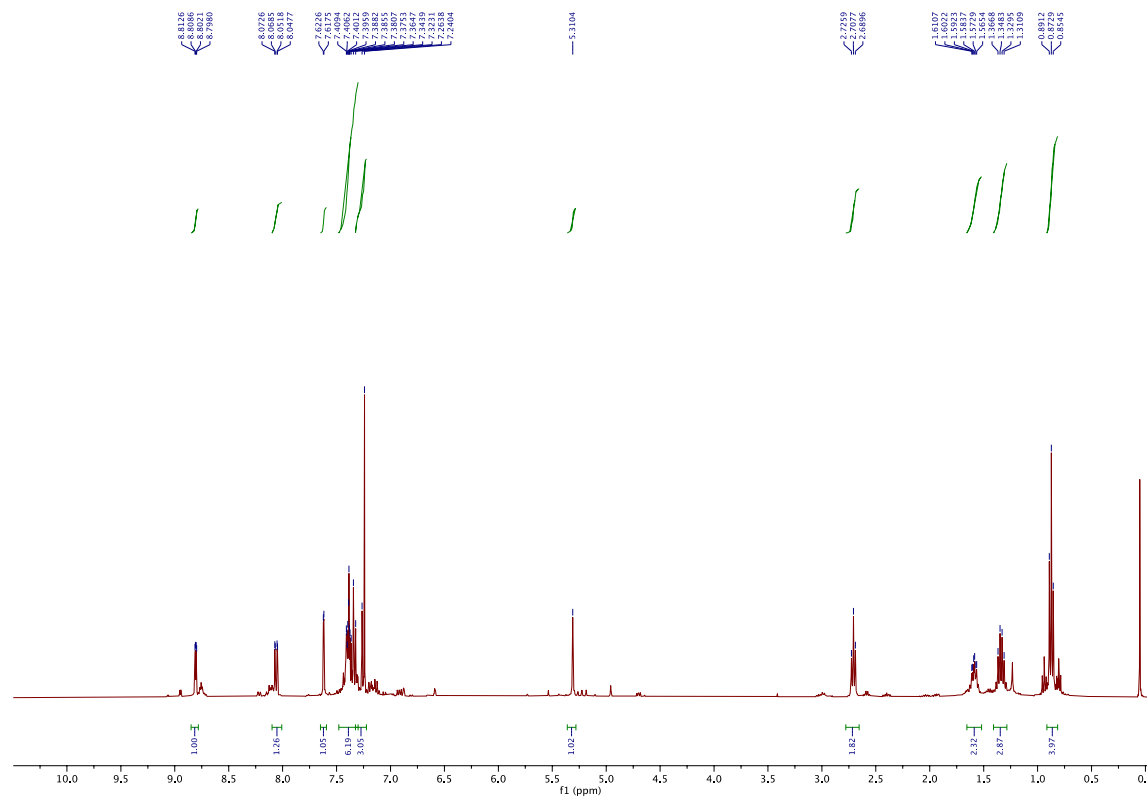

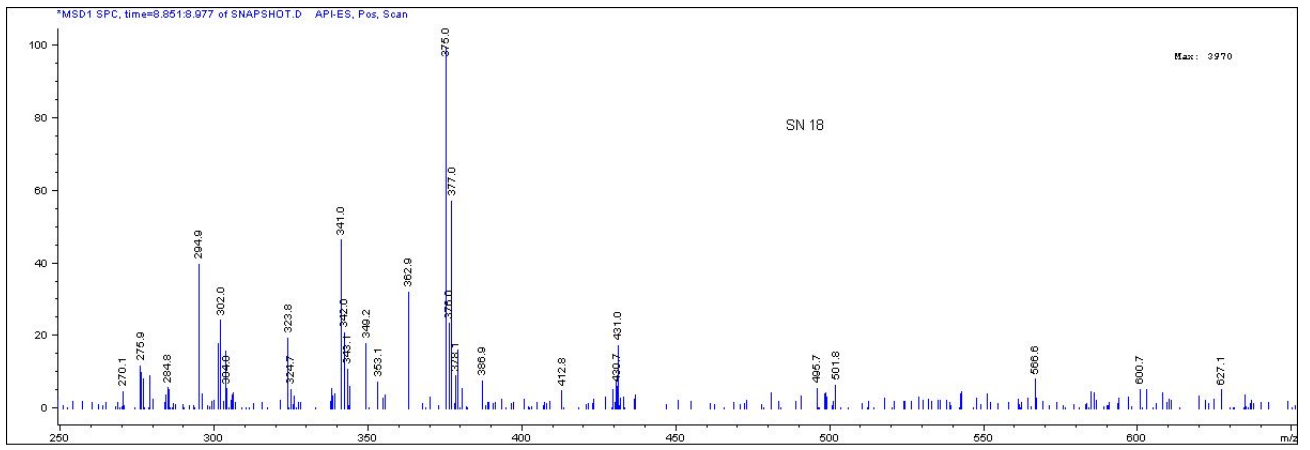

Compound 22.

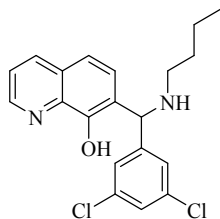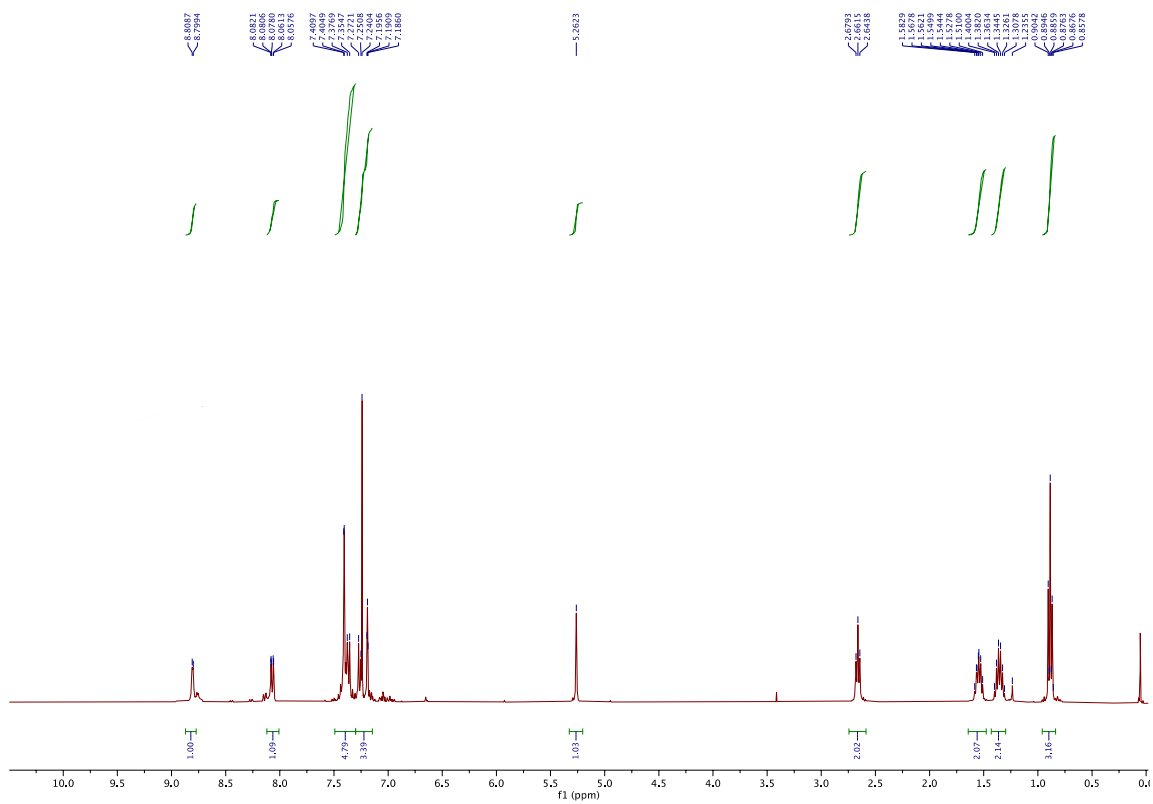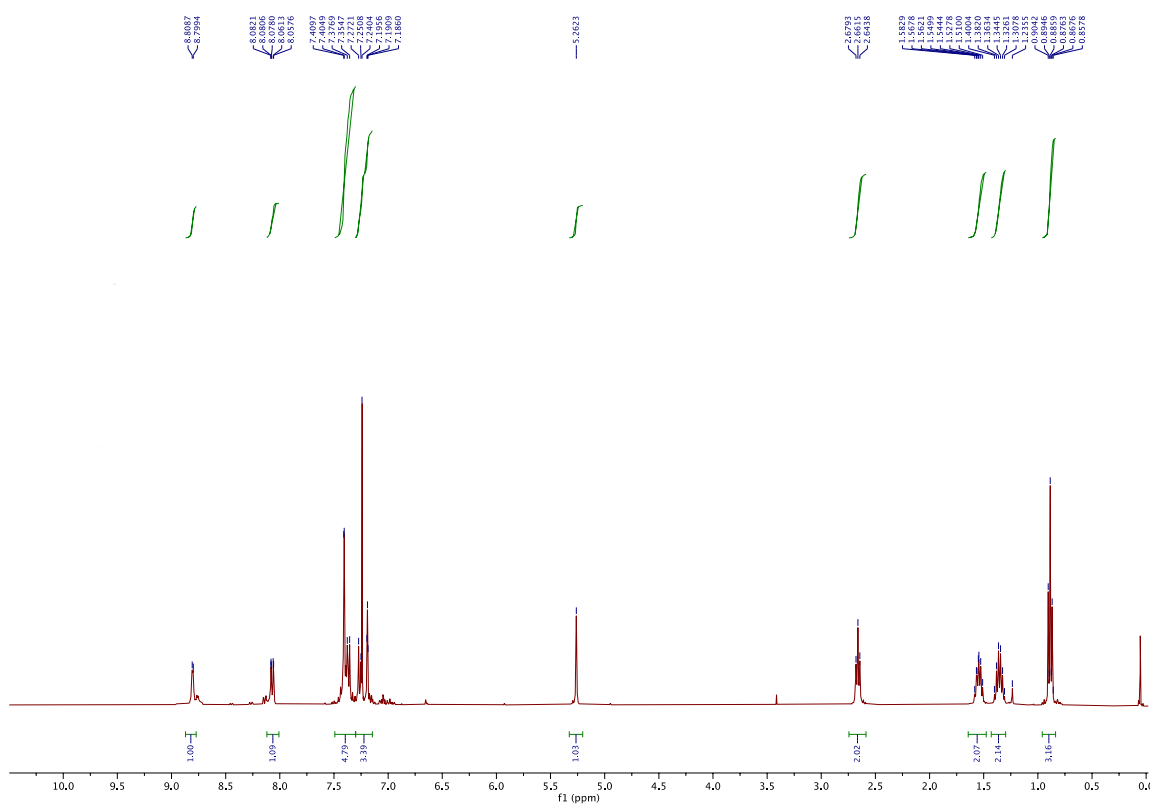

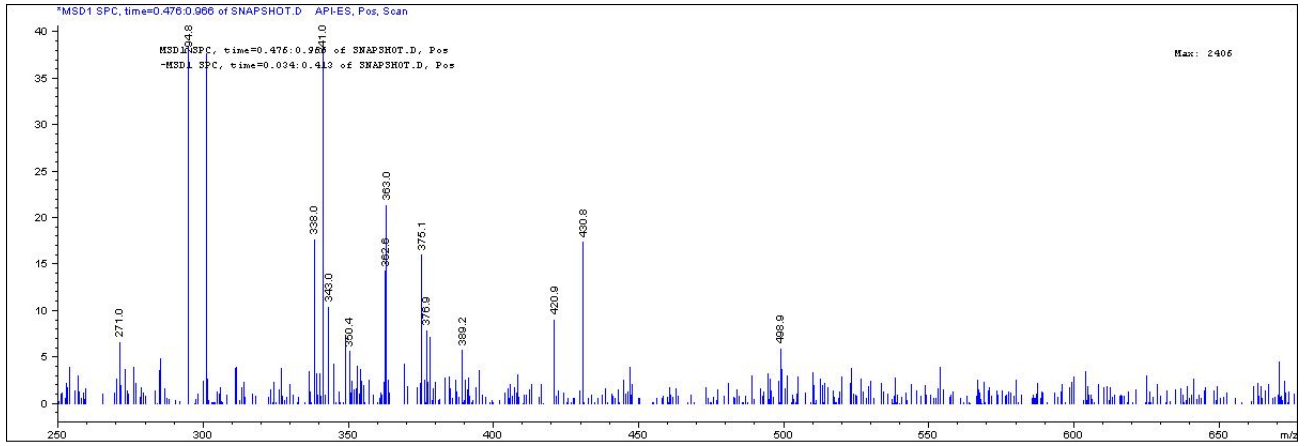

Com

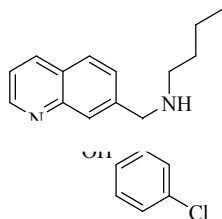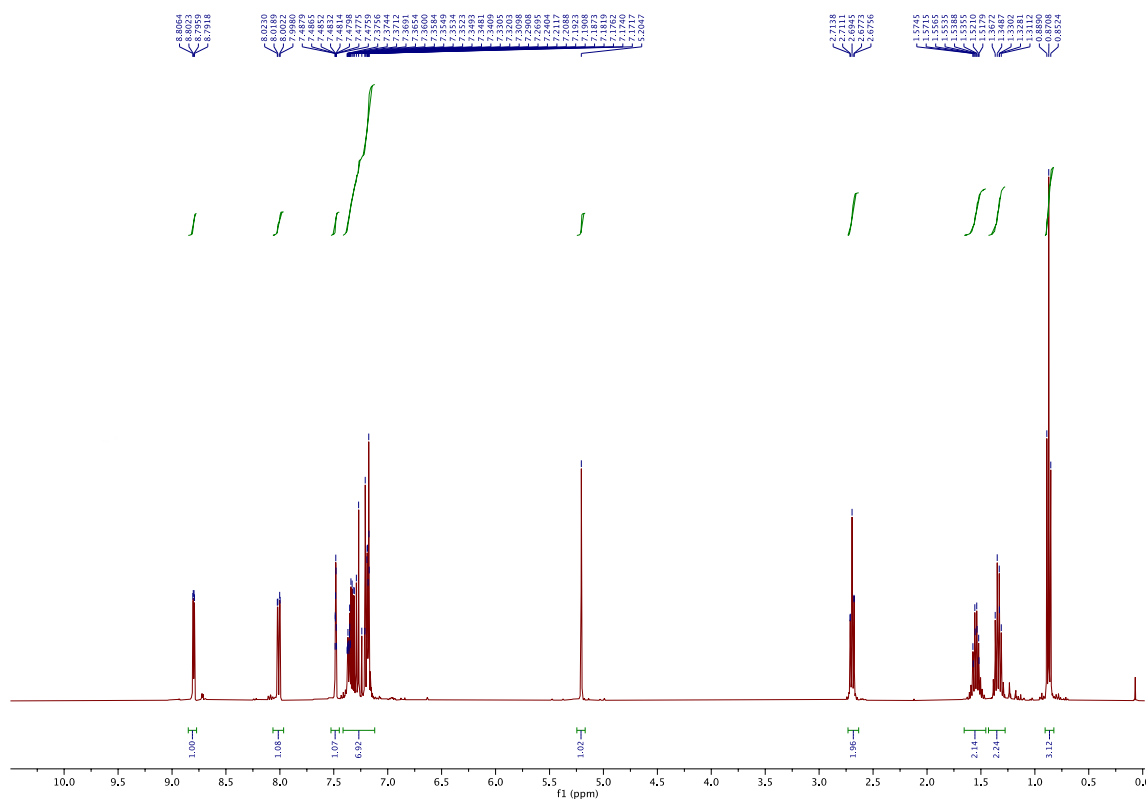

SN21.2.fid  
SN21.13C

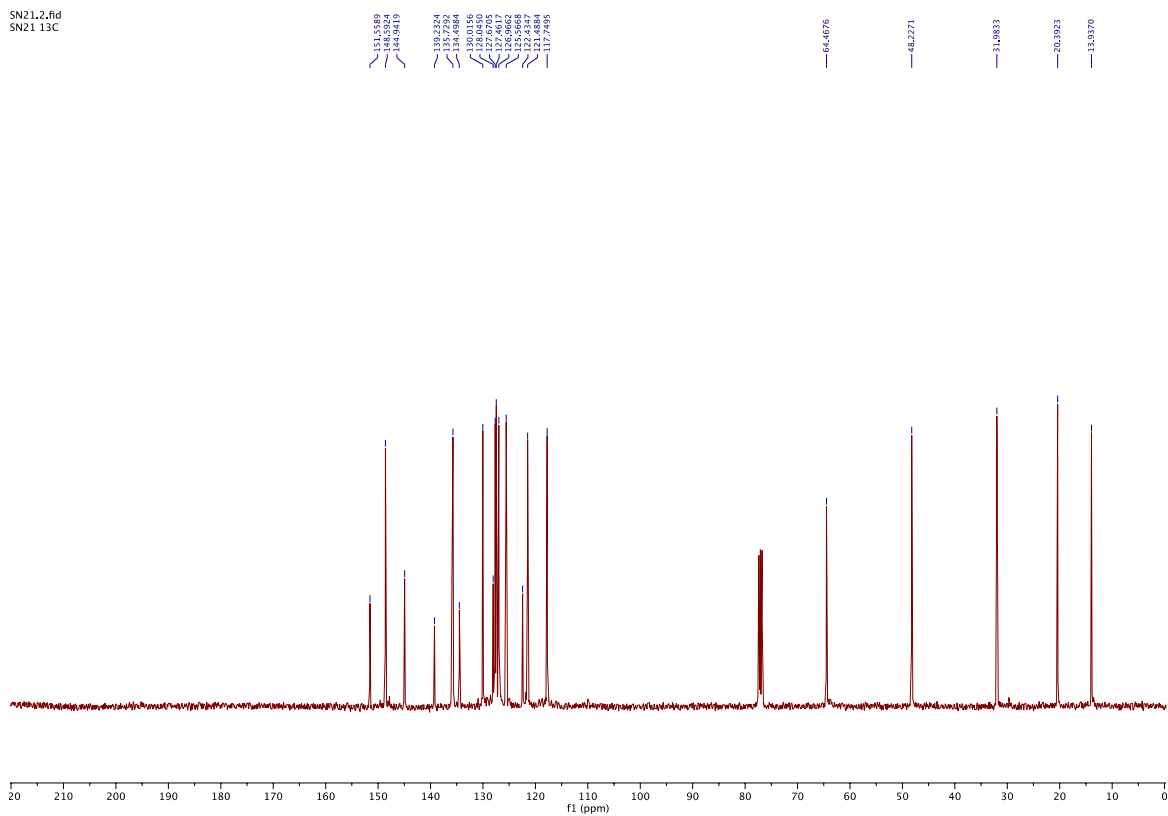



\*MSD1 SPC, time=0.287,0.635 of SNAPSHOT.D API-ES, Pos, Scan  
\*MSD1 SPC, time=0.287,0.635 of SNAPSHOT.D API-ES, Pos, Scan

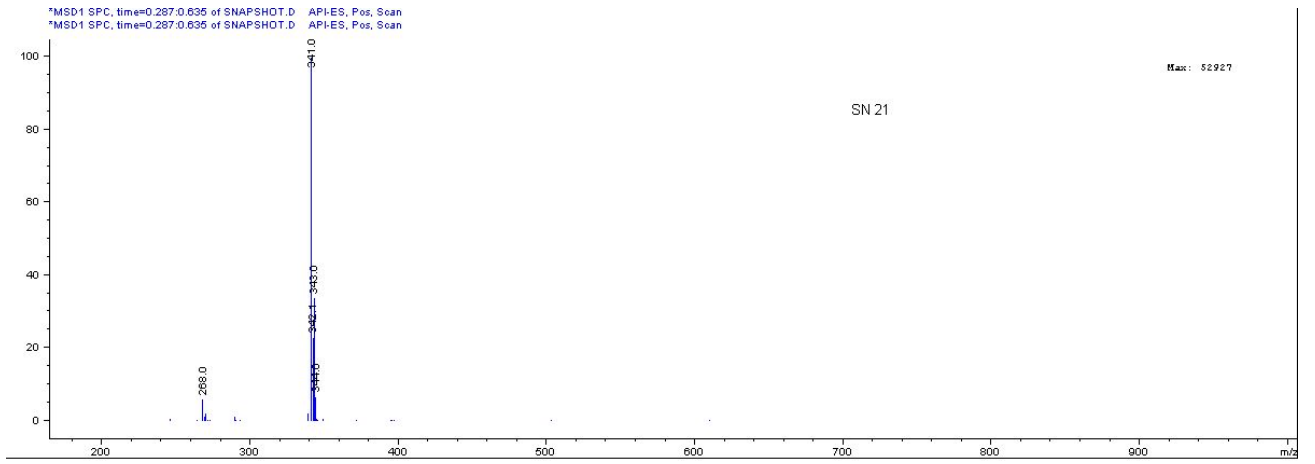

Compound 25.

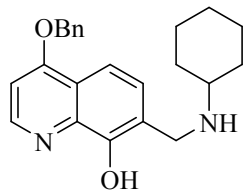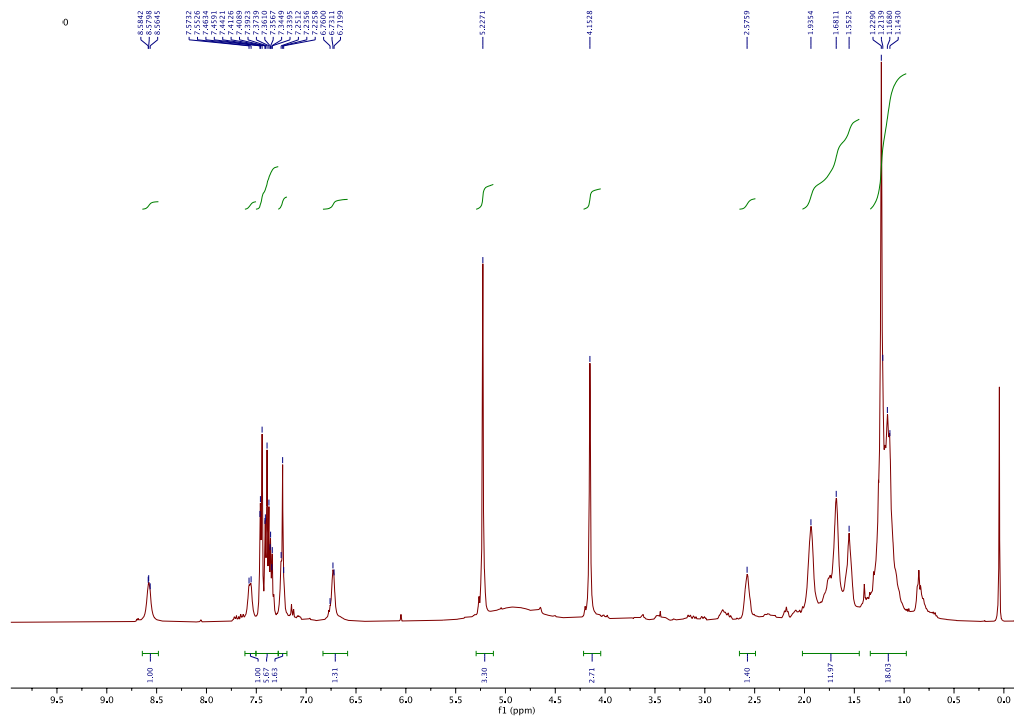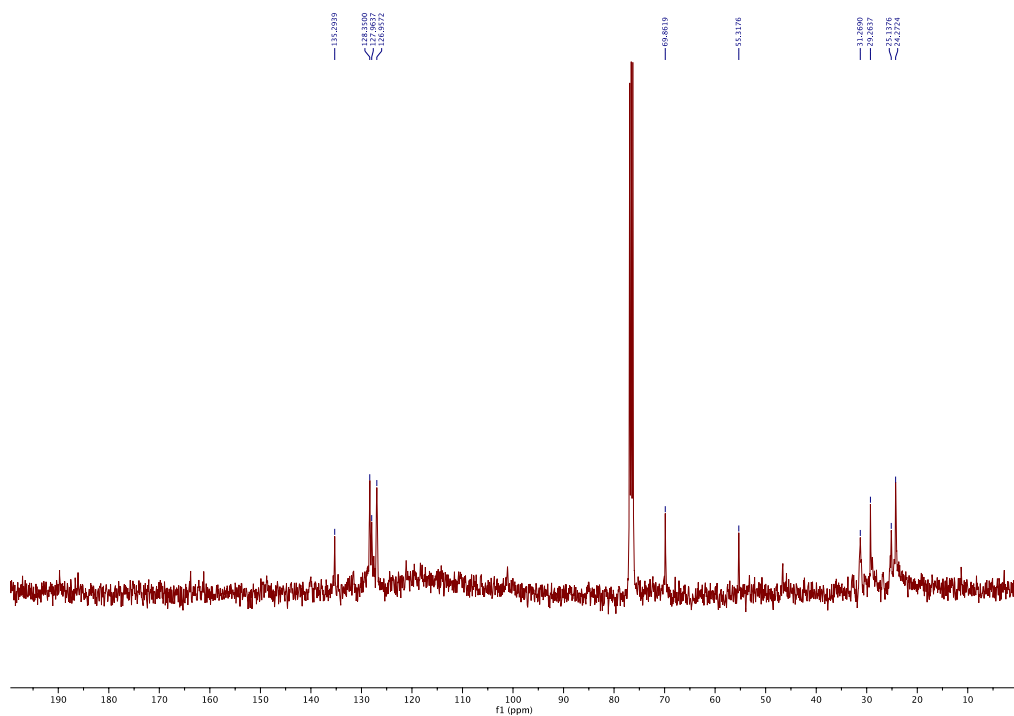

Compound 24.

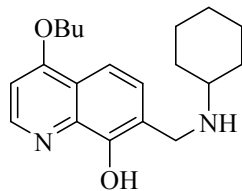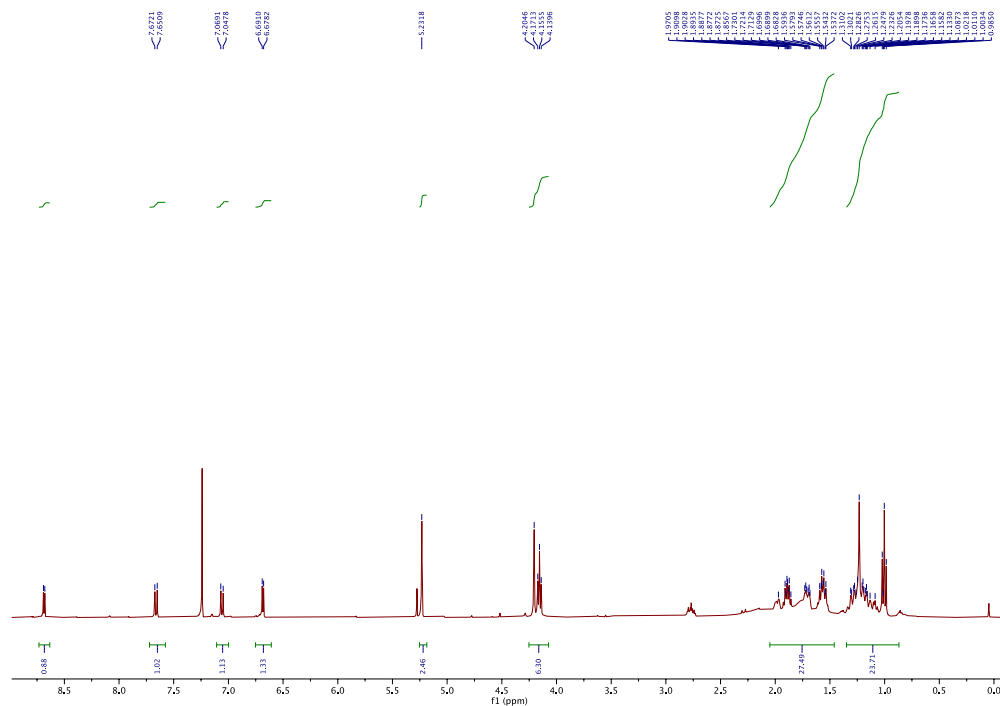

Compound 26.

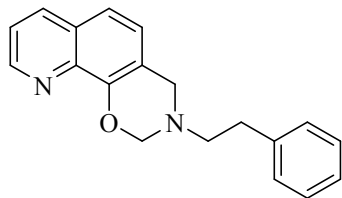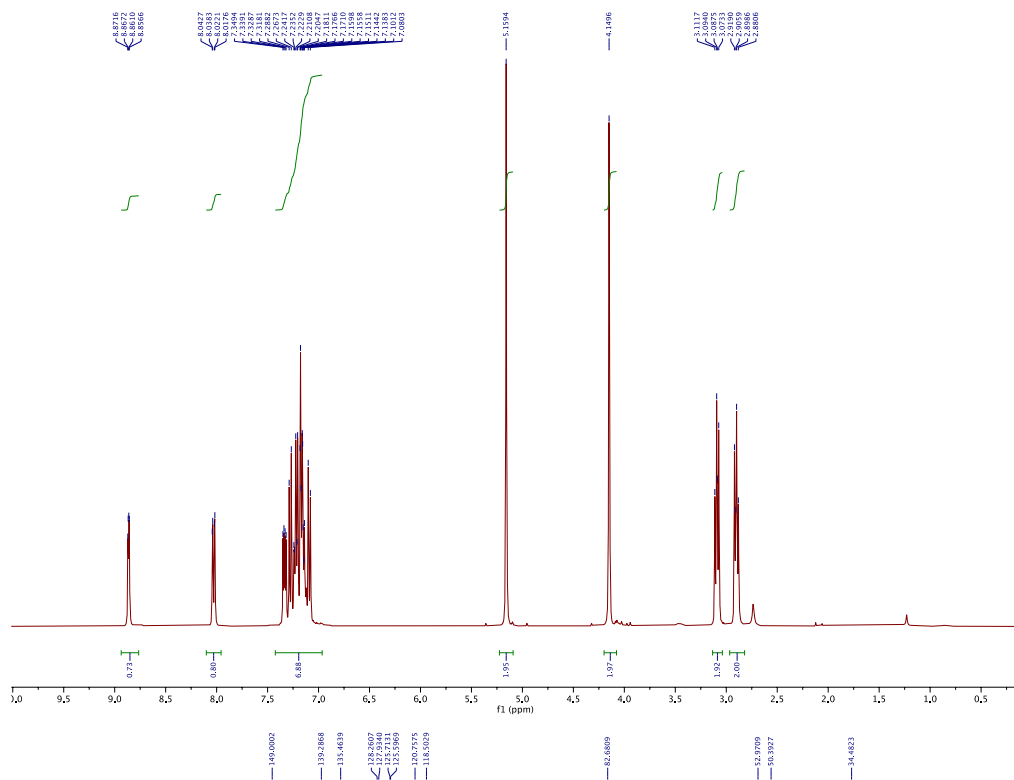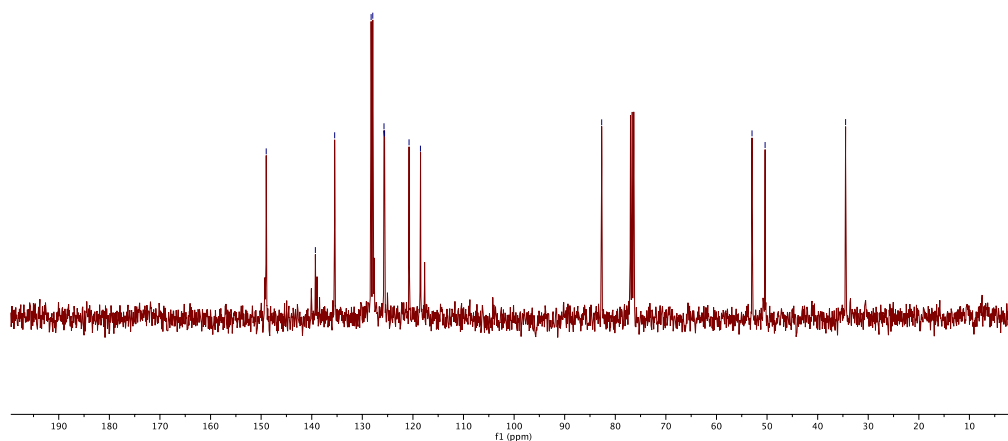

Compound 27.

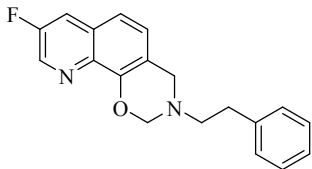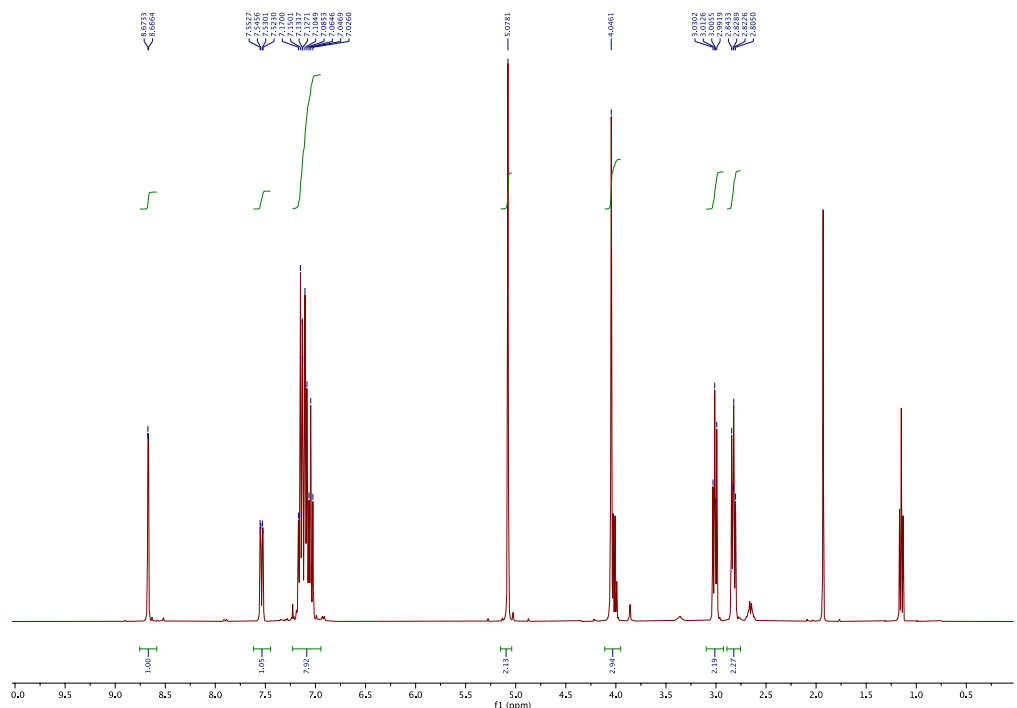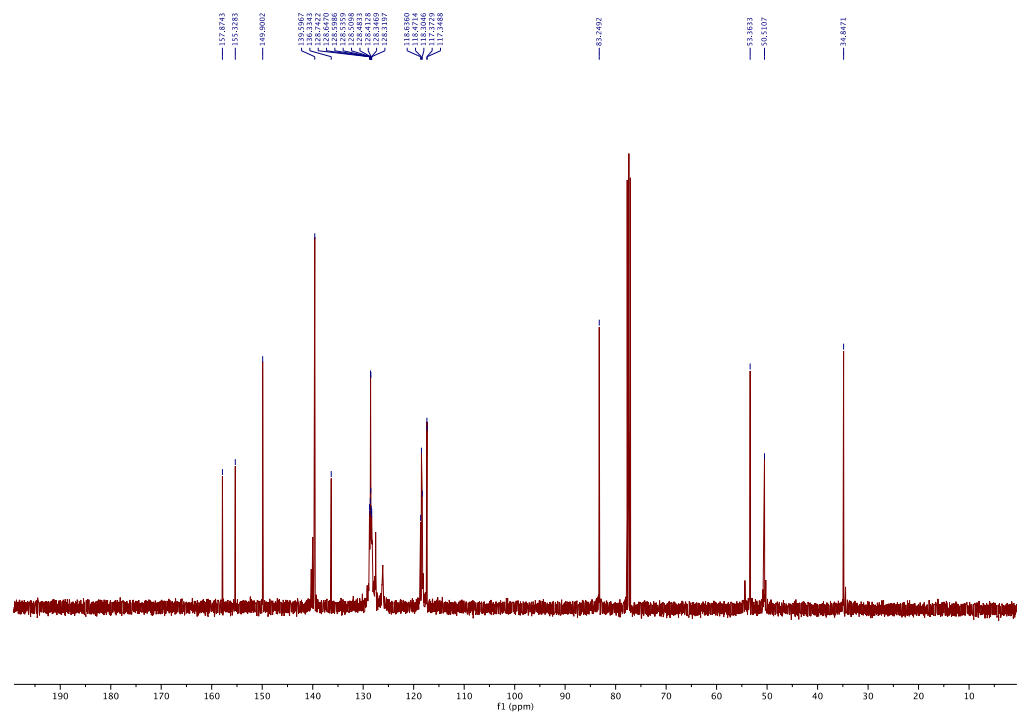

Composto **28**.

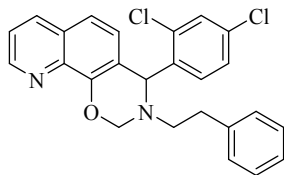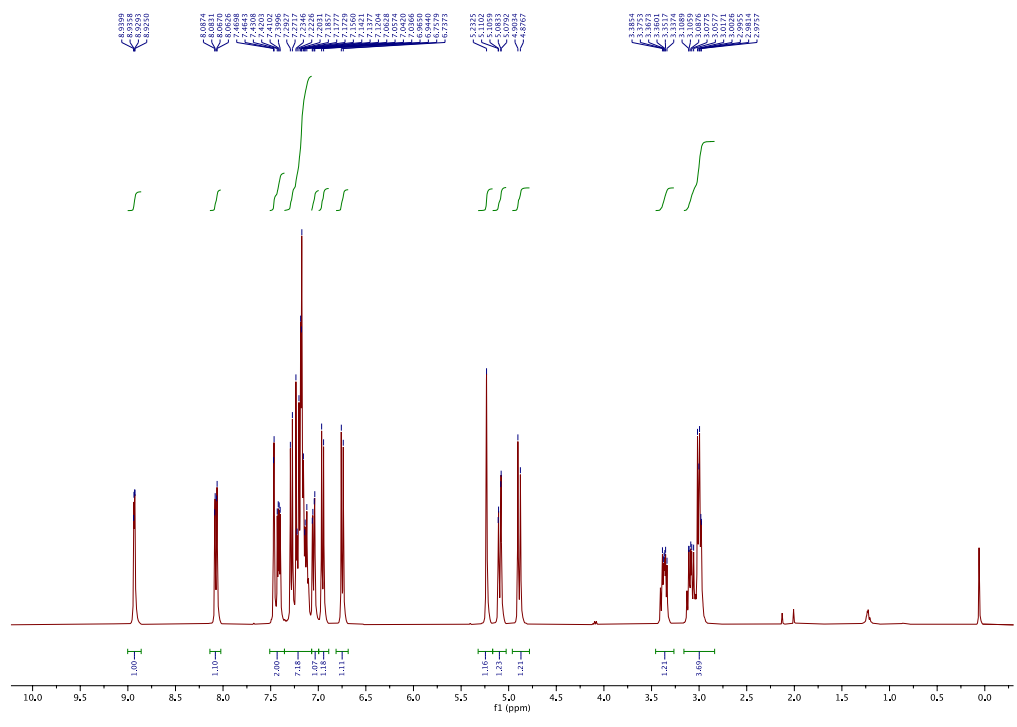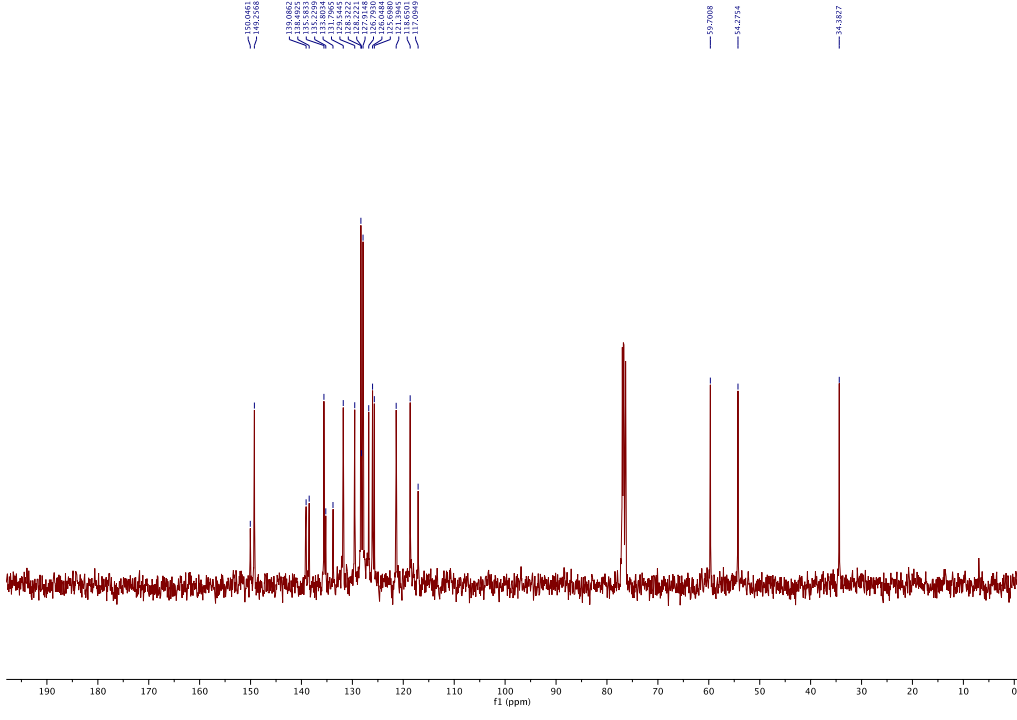

Composto 29.

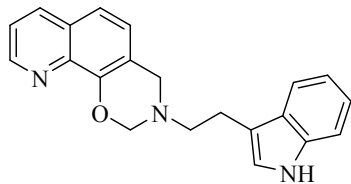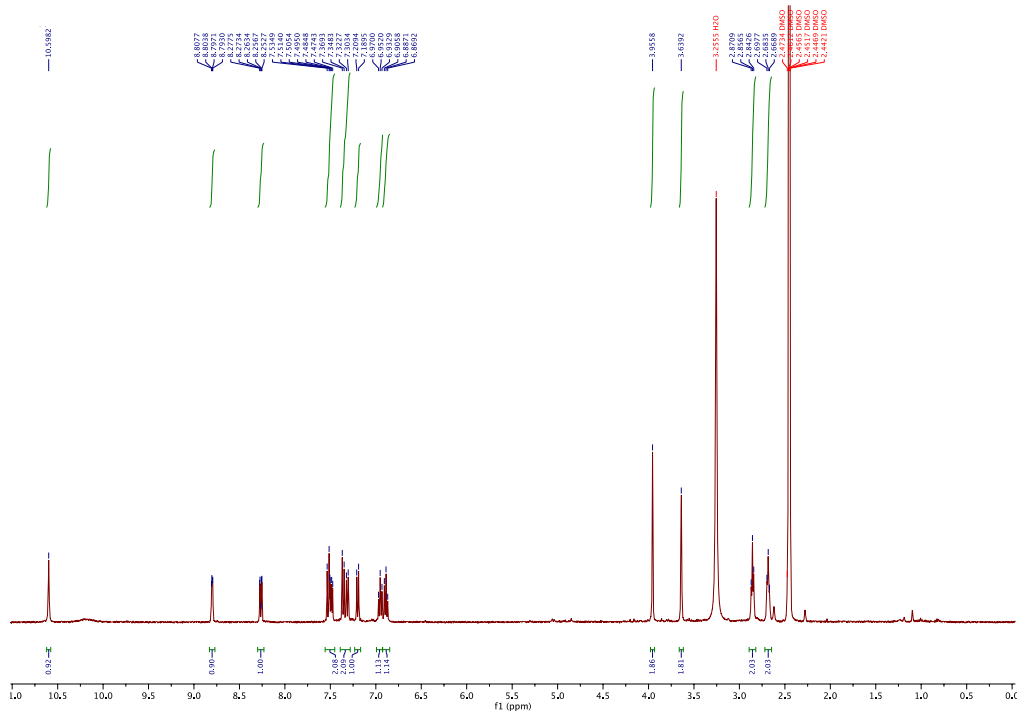

Composto 30.

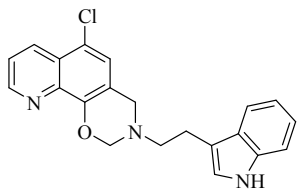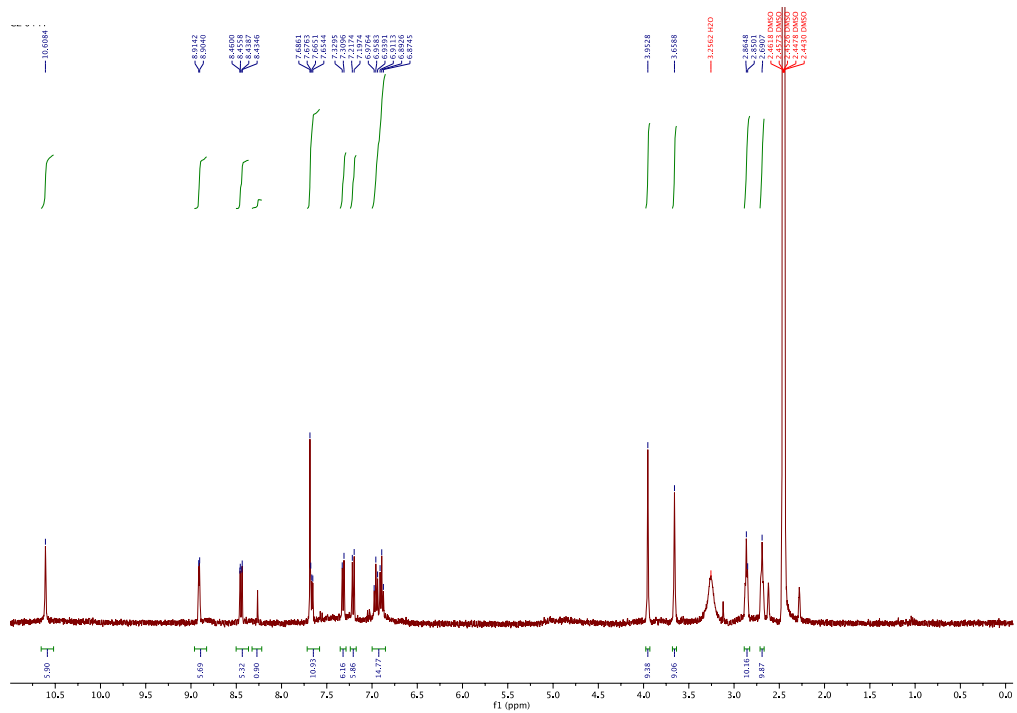



Composto 32.

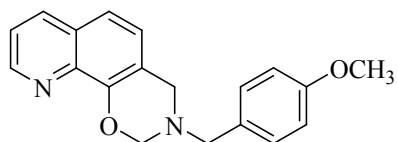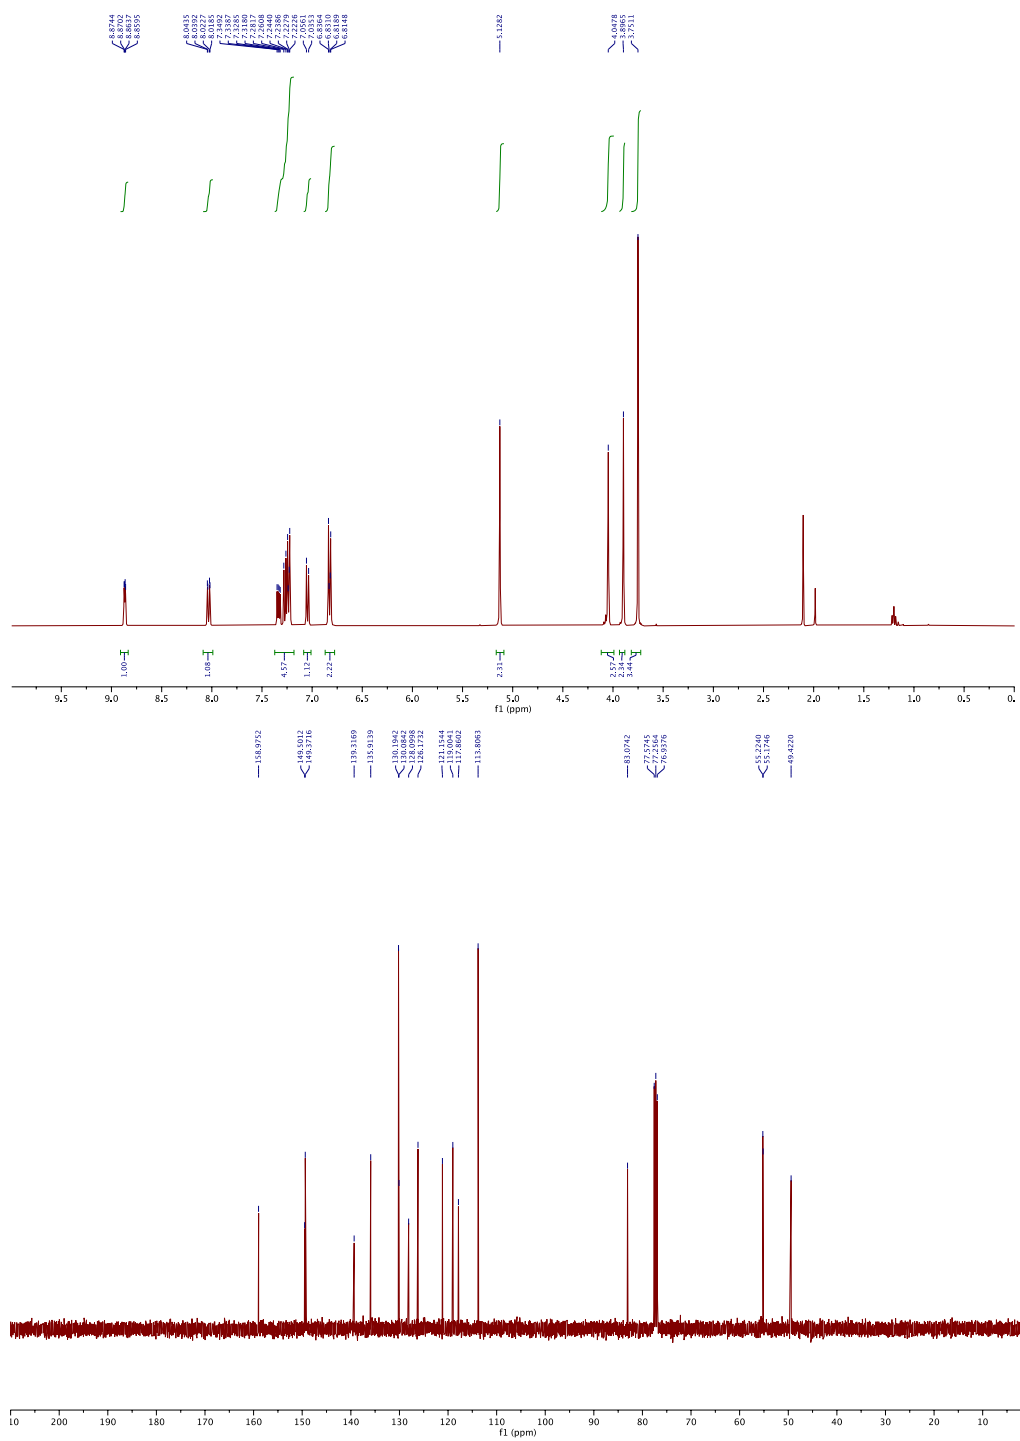

Composto 33.

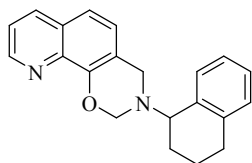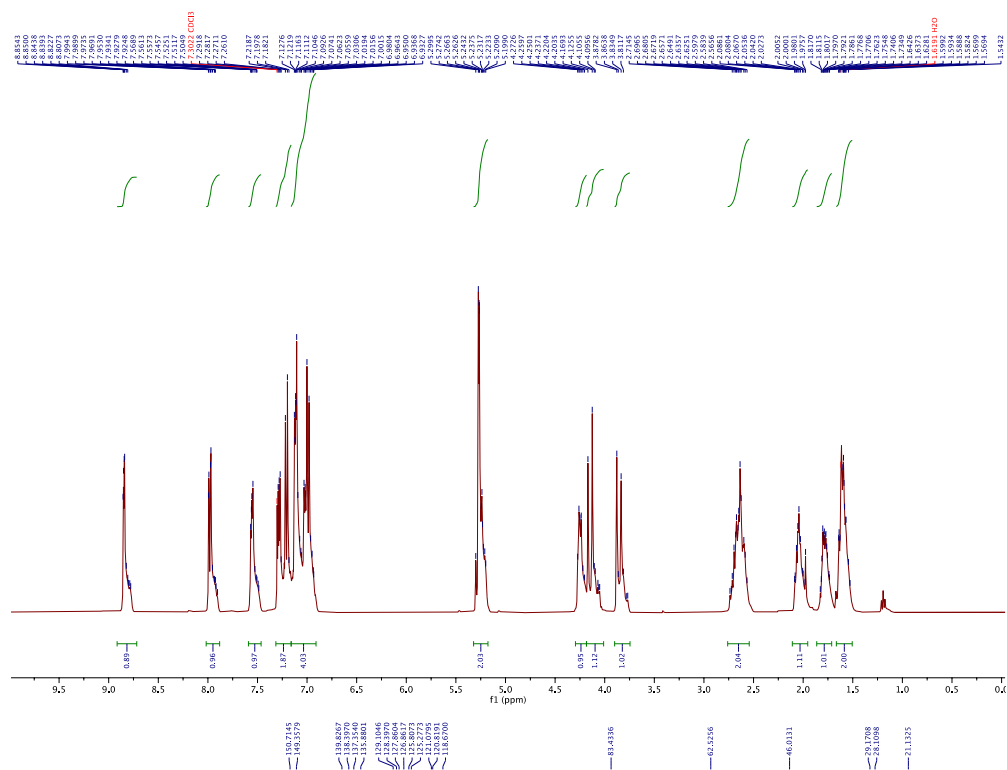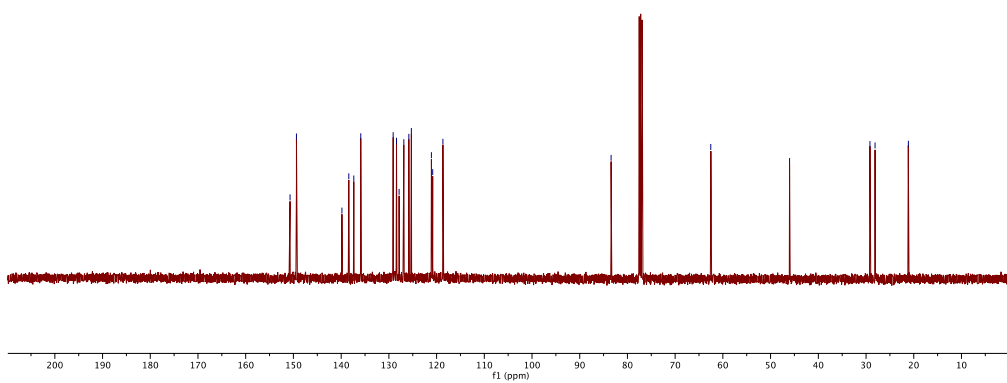

Composto **34**.

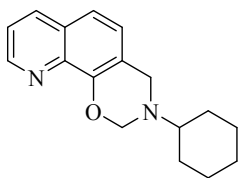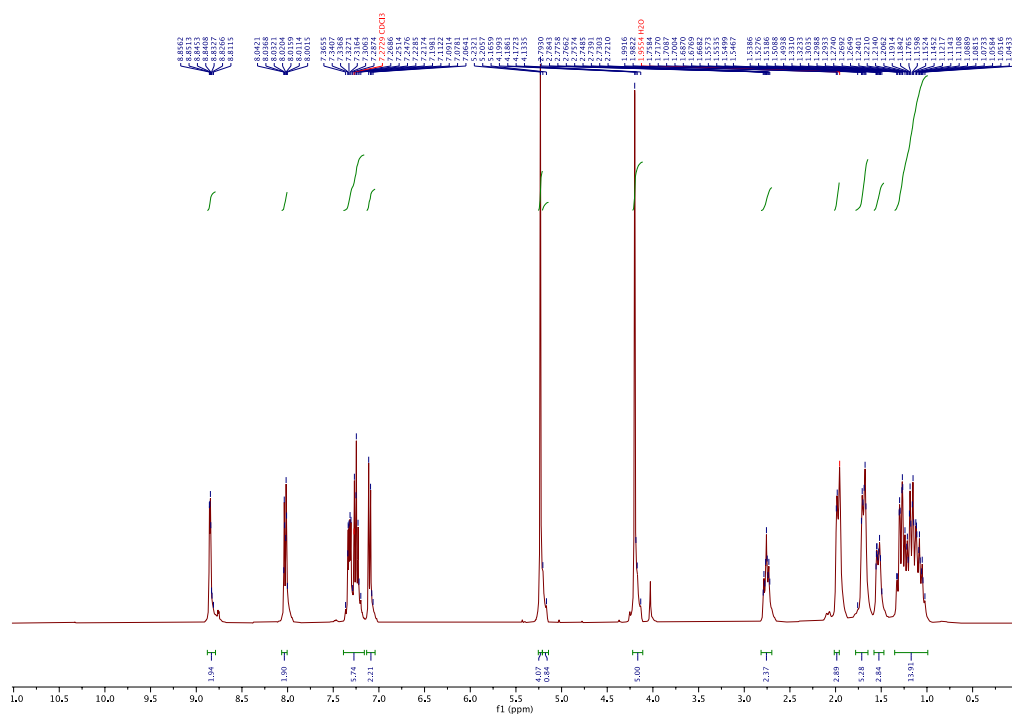



Composto 36.

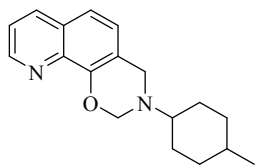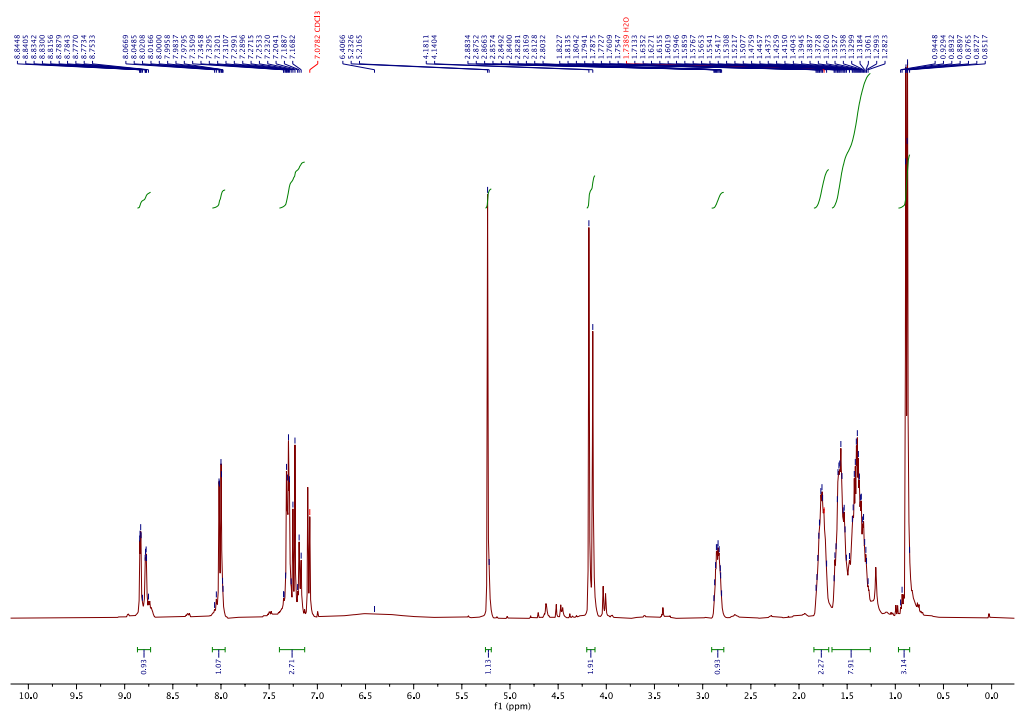

Composto 37.

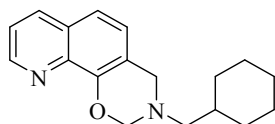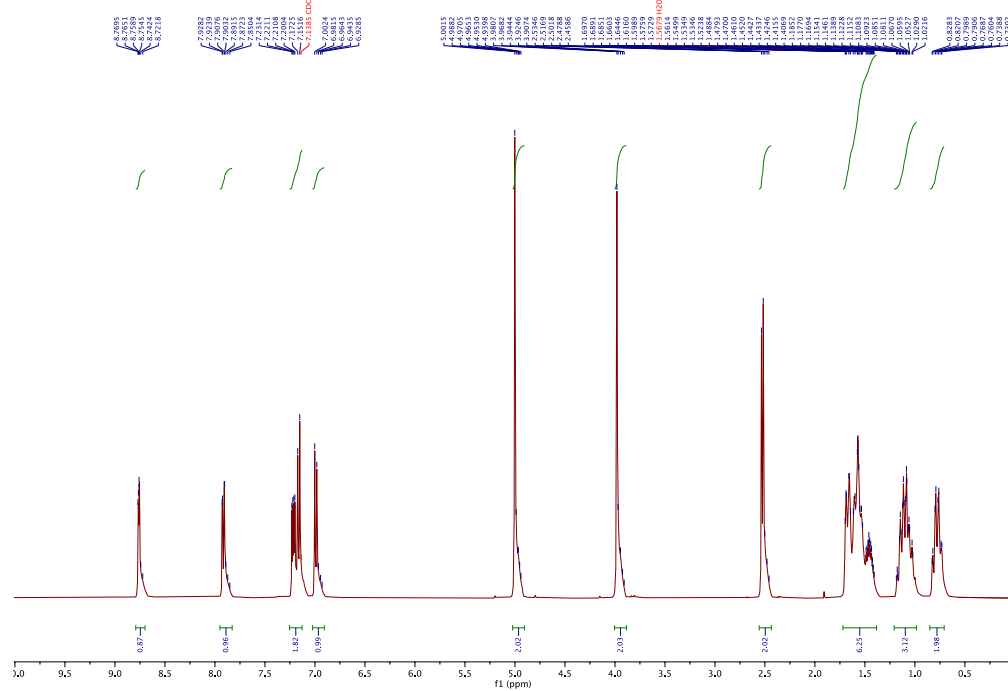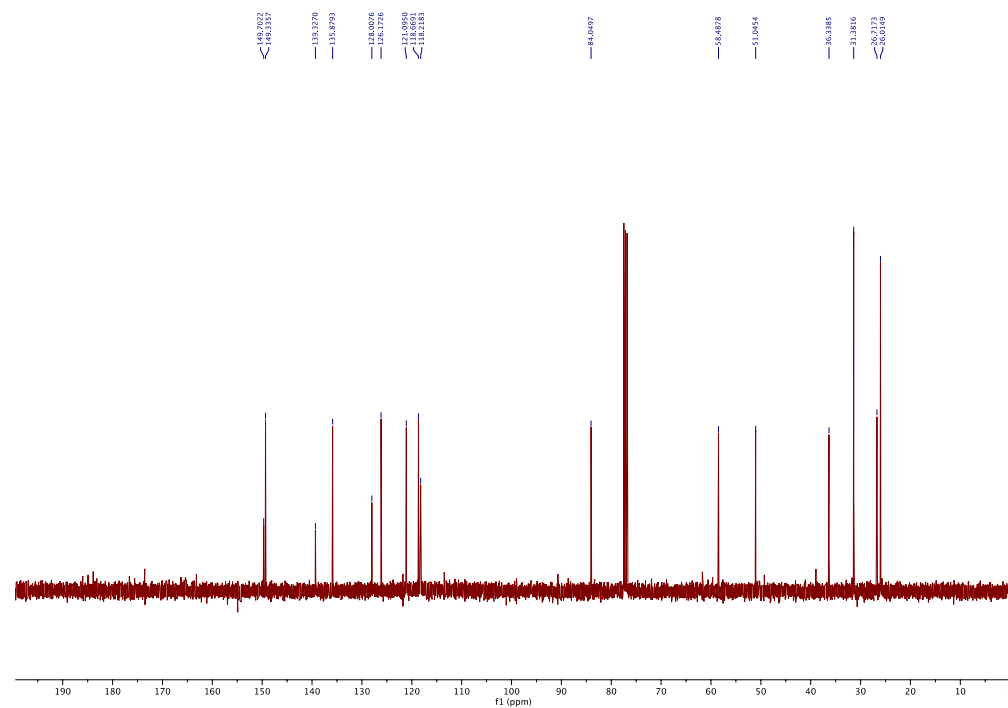

Composto 38.

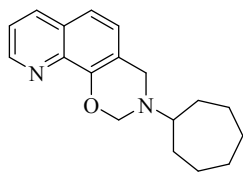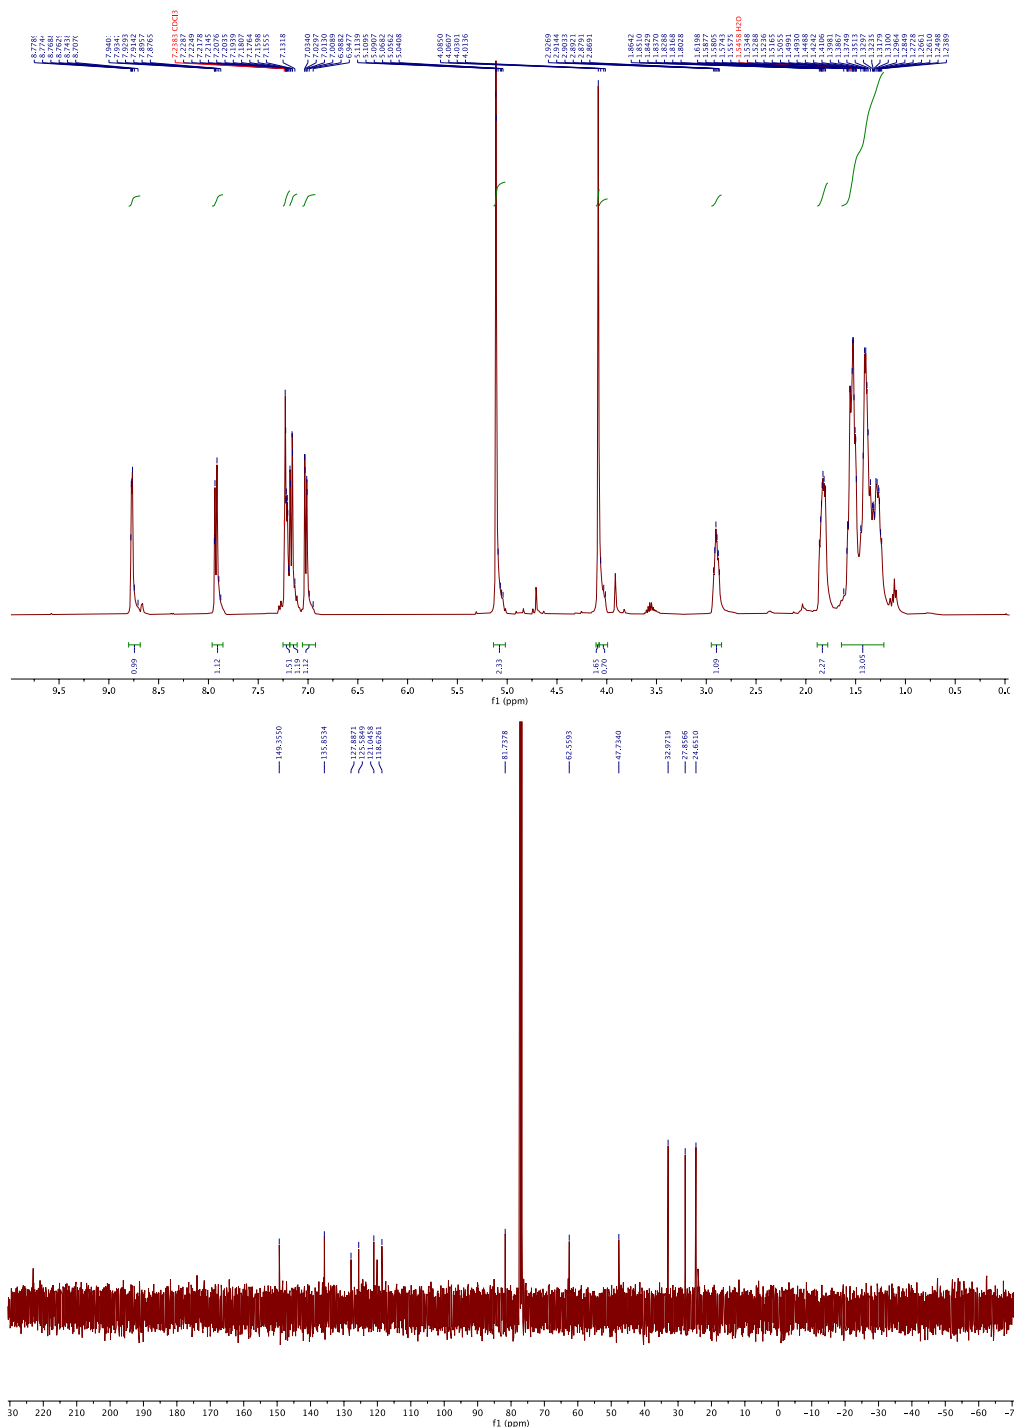

Composto 39.

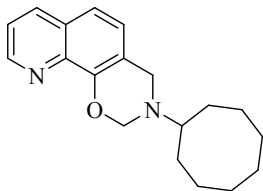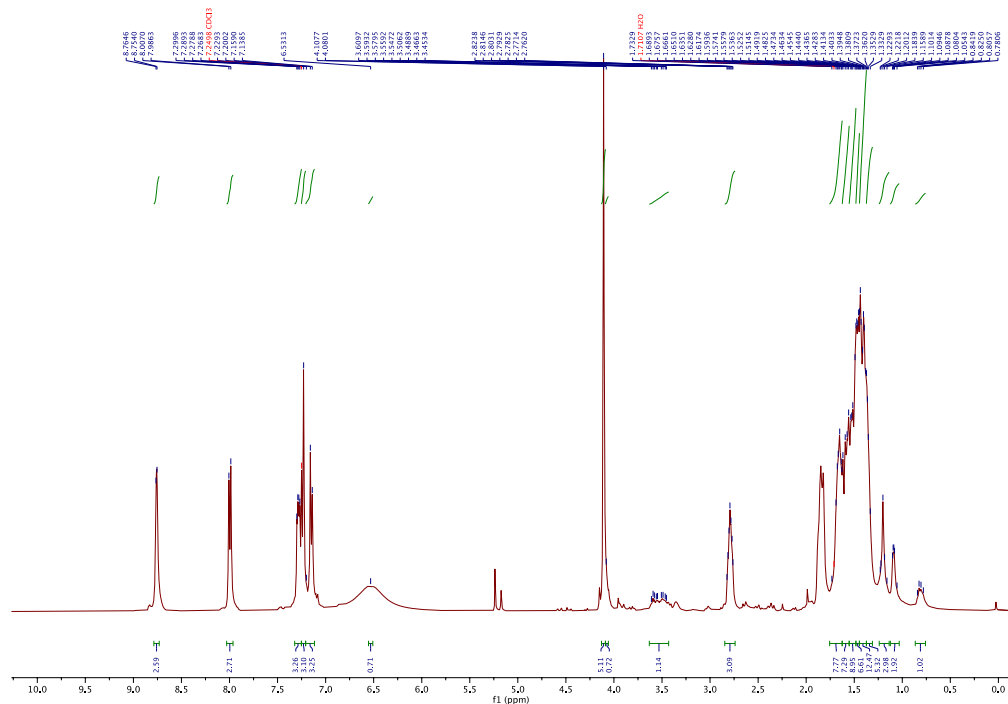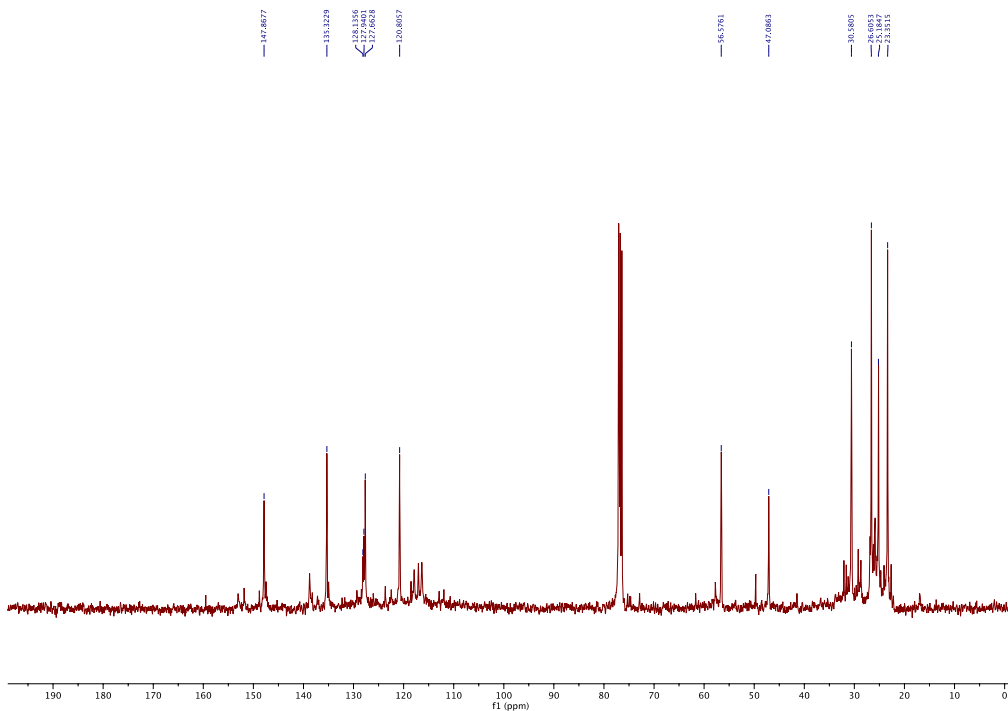



Composto 42.

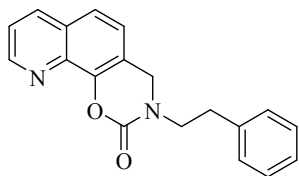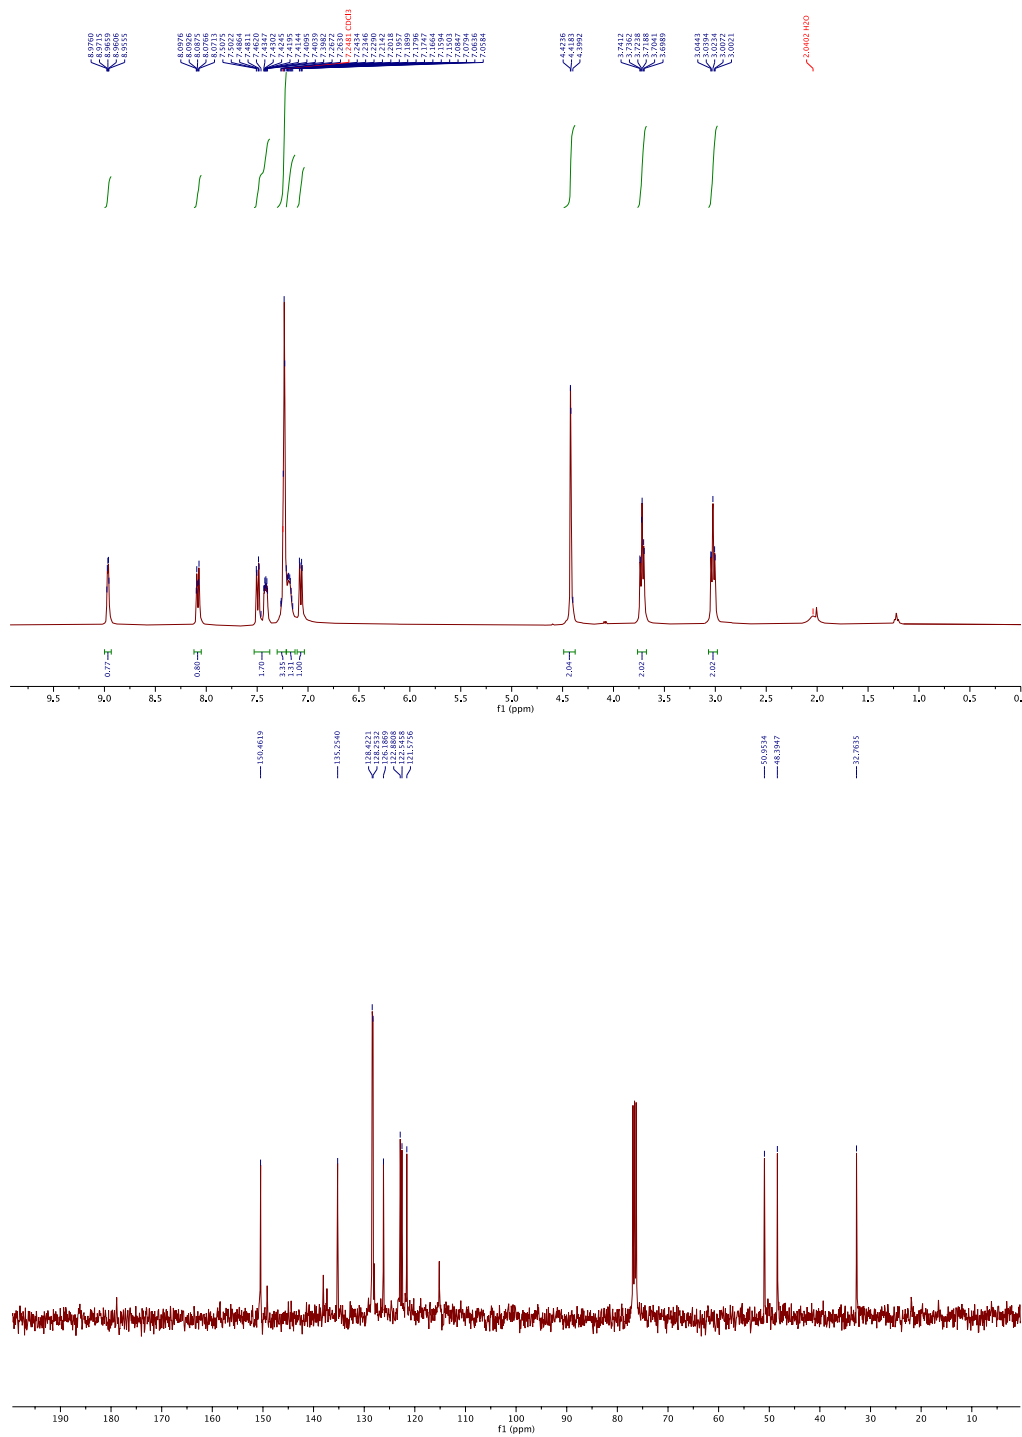

### Composto 43.

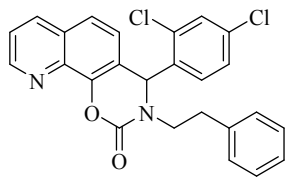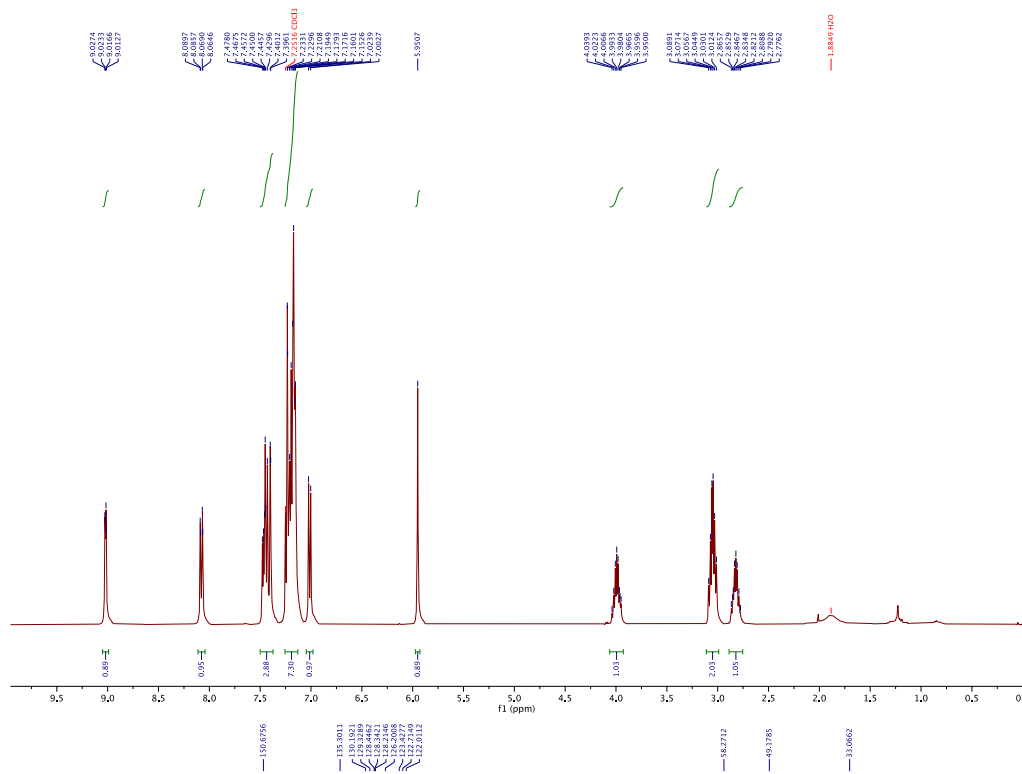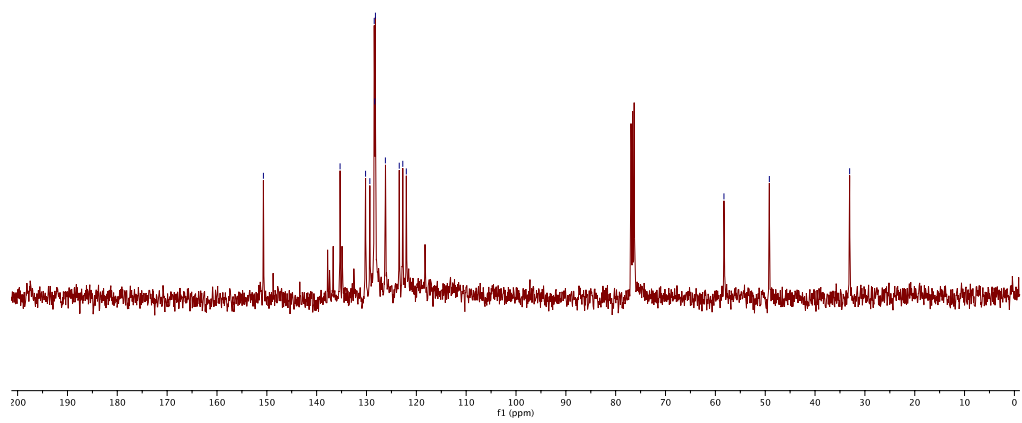

## REFERENCES

1. Bhakta, S.; Scalacci, N.; Maitra, A.; Brown, A. K.; Dasugari, S.; Evangelopoulos, D.; McHugh, T. D.; Mortazavi, P. N.; Twist, A.; Petricci, E.; Manetti, F.; Castagnolo, D. Design and synthesis of 1-((1,5-bis(4-chlorophenyl)-2-methyl-*1H*-pyrrol-3-yl)methyl)-4-methylpiperazine (BM212) and *N*-adamantan-2-yl-*N'*-((*E*)-3,7-dimethylocta-2,6-dienyl)ethane-1,2-diamine (SQ109) pyrrole hybrid derivatives: discovery of potent antitubercular agents effective against multidrug-resistant *Mycobacteria*. *J. Med. Chem.* **2016**, *59*, 2780-2793.
2. Badolato, M.; Carullo, G.; Perri, M.; Cione, E.; Manetti, F.; Di Gioia, M. L.; Brizzi, A.; Caroleo, M. C.; Aiello, F. Quercetin/oleic acid-based G-protein-coupled receptor 40 ligands as new insulin secretion modulators. *Future Med. Chem.* **2017**, *9*, 1873-1885.
3. Manetti, F.; Stecca, B.; Santini, R.; Maresca, L.; Giannini, G.; Taddei, M.; Petricci, E. Pharmacophore-based virtual screening for identification of negative modulators of GII1 as potential anticancer agents. *ACS Med. Chem. Lett.* **2020**, *11*, 832-838.
4. Asinex Corporation, [www.asinex.com](http://www.asinex.com).
5. AKos Consulting & Solutions GmbH, <http://www.akosgmbh.de>.
6. Pandolfi, S.; Montagnani, V.; Lapucci, A.; Stecca, B. HEDGEHOG/GLI-E2F1 axis modulates iASPP expression and function and regulates melanoma cell growth. *Cell Death Differ.* **2015**, *22*, 2006-2019.
7. Pietrobono, S.; Santini, R.; Gagliardi, S.; Dapporto, F.; Colecchia, D.; Chiariello, M.; Leone, C.; Valoti, M.; Manetti, F.; Petricci, E.; Taddei, M.; Stecca, B. Targeted inhibition of Hedgehog-GLI signaling by novel acylguanidine derivatives inhibits melanoma cell growth by inducing replication stress and mitotic catastrophe. *Cell Death Dis.* **2018**, *9*, 142.
